# A mechanism with severing near barbed ends and annealing explains structure and dynamics of dendritic actin networks

Danielle Holz<sup>1</sup>, Aaron R. Hall<sup>1</sup>, Eiji Usukura<sup>2</sup>, Sawako Yamashiro<sup>2</sup>, Naoki Watanabe<sup>2</sup>, and Dimitrios Vavylonis<sup>1,\*</sup>

<sup>1</sup>Department of Physics, Lehigh University, Bethlehem PA 18015

<sup>2</sup>Laboratory of Single-Molecule Cell Biology, Kyoto University Graduate School of Medicine, Kyoto Japan

\*Correspondence: [vavylonis@lehigh.edu](mailto:vavylonis@lehigh.edu)

**ABSTRACT** Single molecule imaging has shown that part of actin disassembles within a few seconds after incorporation into the dendritic filament network in lamellipodia, suggestive of frequent destabilization near barbed ends. To investigate the mechanisms behind network remodeling, we created a stochastic model with polymerization, depolymerization, branching, capping, uncapping, severing, oligomer diffusion, annealing, and debranching. We find that filament severing, enhanced near barbed ends, can explain the single molecule actin lifetime distribution, if oligomer fragments reanneal to free ends with rate constants comparable to in vitro measurements. The same mechanism leads to actin networks consistent with measured filament, end, and branch concentrations. These networks undergo structural remodeling, leading to longer filaments away from the leading edge, at the  $\pm 35^\circ$  orientation pattern. Imaging of actin speckle lifetimes at sub-second resolution verifies frequent disassembly of newly-assembled actin. We thus propose a unified mechanism that fits a diverse set of basic lamellipodia phenomenology.

## INTRODUCTION

The force for lamellipodial protrusions is provided by a dendritic network of actin filaments. This dynamic structure is driven by actin filament polymerization, branch generation by the Arp2/3 complex and regulation of filament elongation by capping protein (Blanchoin et al., 2014; Pollard and Borisy, 2003; Watanabe, 2010). Activated by nucleation promoting factors on the cell membrane, the Arp2/3 complex nucleates filament branches at an angle of approximately  $70^\circ$  from filaments that reach the leading edge. These elongating barbed ends add actin monomers from the cytoplasm to push against the cell membrane and generate force for membrane extension or for the retrograde flow of the whole dendritic actin network towards the cell center. This dendritic lamellipodia network structure, evident in electron micrographs of keratocytes (Svitkina et al., 1997) has been quantified by more recent electron tomograms near the leading edge, revealing the number of barbed ends, branches and filaments (Mueller et al., 2017; Vinzenz et al., 2012). Its characteristic pattern with filaments orientated primarily at  $\pm 35^\circ$  with respect to the protrusion axis (Koseki et al., 2019; Maly and Borisy, 2002; Mueller et al., 2017; Schaub et al., 2007) has been interpreted by two dimensional dendritic network models (Atilgan et al., 2005; Holz and Vavylonis, 2018; Maly and Borisy, 2002; Schaus et al., 2007; Weichsel and Schwarz, 2010).

In parallel to polymerization and branching at the leading edge, lamellipodia maintain their steady state through continuous disassembly and recycling of actin (Blanchoin et al., 2014; Pollard and Borisy, 2003; Watanabe, 2010). Extensive biochemical and biophysical studies have identified critical aspects of the kinetics and thermodynamics of this turnover process, with cofilin and hydrolysis of ATP bound to actin after polymerization, followed by  $P_i$  release, playing a central role. However the precise molecular mechanisms of actin turnover in cells have not been fully resolved (Carlier and Shekhar, 2017; Carlsson, 2010; Danuser and Waterman-Storer, 2006).

Single-Molecule Speckle (SiMS) microscopy of fluorescently labeled actin revealed that actin assembly into the dendritic network is transient and not limited to the leading edge (Watanabe and Mitchison, 2002; Yamashiro et al., 2018). In these SiMS experiments, actin subunits incorporated into the actin network appear as single molecule speckles while diffuse actin contributes to background fluorescence. In the lamellipodium, speckle disappearances occur within a few seconds after speckle appearances, a time which is relatively short compared to the time required for actin treadmilling through the entire lamellipodium. Since filament treadmilling cannot explain these dynamics, Miyoshi and Watanabe proposed the hypothesis of frequent filament severing near barbed ends, following by annealing of the oligomeric fragment (Miyoshi and Watanabe, 2013).

Holz et al.

Consistent with the frequent severing near ends and annealing hypothesis, in vitro experiments show dissociation of filament fragments from ends of actin filaments in vitro, in the presence of cofilin and co-factors (Andrianantoandro and Pollard, 2006; Kueh et al., 2008; McCullough et al., 2008; Shekhar and Carlier, 2017; Wioland et al., 2017). End-to-end annealing of actin filaments is also well-established in vitro (Andrianantoandro et al., 2001; Popp et al., 2007; Sept et al., 1999). Cellular factors such as cofilin and Aip1 may indeed allow filament annealing to the barbed end after severing while also restricting it from resuming elongation (Okada et al., 2002; Wioland et al., 2017). Additionally, an independent-particle Monte Carlo model based on actin SiMS data used to model FRAP of actin in lamellipodia (Smith et al., 2013), as well as actin monomer photoactivation experiments (Vitriol et al., 2015), provided better fits with local recycling of slowly diffusing actin back into the network throughout the lamellipodium. A large fraction of slowly-diffusing oligomers were indeed observed in fragments of keratocyte lamellipodia (Aroush et al., 2017), however the model developed by these authors did not consider or require the presence of a local recycling mechanism.

Distributed turnover through severing and annealing may relate to another puzzle of lamellipodia structure revealed in electron micrographs (Svitkina et al., 1997): while a dense branched brushwork of filaments is observed near the leading edge (approximately within 1  $\mu\text{m}$ ), further away from the leading edge (approximately 3-4  $\mu\text{m}$  away), filaments are longer and appear more linear. The mechanism required for this remodeling has yet to be determined.

To test the hypothesis of frequent severing and annealing in distributed turnover and structural remodeling of the actin network, we created a three-dimensional kinetic model of a steady-state lamellipodium based on the dendritic nucleation model. To develop a network with the observed  $\pm 35^\circ$  filament orientation pattern, we systematically examined the self-organizing filament orientation pattern as a function of the relative network growth speed. Using parameter sets matching lamellipodia of the widely studied keratocyte or XTC cell types, we perform a search over parameters describing uniform severing along the actin filament and enhanced severing near barbed ends. The model considers the diffusion and annealing of severed oligomers. We find that a model without annealing cannot reproduce both the filamentous lamellipodial structure and actin SiMS data. With the addition of oligomer diffusion, annealing and enhanced severing near barbed ends, the structure, SiMS data, and overall increase in filament length with distance from the leading edge can be reproduced for optimized parameters. We support this mechanism by performing SiMS of Dylight-labeled actin on XTC cells indicating frequent disassembly of recently polymerized F-actin close to the leading edge. Our study thus supports that frequent severing and annealing is an important mechanism in cellular actin dynamics, motivating further experimental investigations.

## RESULTS

### Stochastic simulation of dendritic network

The model shown in Fig. 1 includes barbed end polymerization, pointed end depolymerization, capping, uncapping, branching near the leading edge, debranching, severing and annealing, without explicitly considering ATP hydrolysis or phosphate release (see Methods and Table 1). We impose a constant network velocity  $v_{net}$  with respect to the leading edge. We selected parameters corresponding to two frequently-studied cell systems, one for fast moving keratocyte cells and one for XTC or fibroblast cells. For keratocytes,  $v_{net}$  corresponds to the rate of cell protrusion, since the actin network is almost stationary with respect to the substrate in experiments (Keren et al., 2008; Mueller et al., 2017; Schaub et al., 2007; Yamashiro et al., 2018). Lamellipodia of XTC cells are frequently studied in cells that do not crawl on the substrate, so  $v_{net}$  provides the magnitude of the retrograde flow speed (Ryan et al., 2012; Watanabe and Mitchison, 2002). We considered uniform severing with rate constant  $k_{sev}^{unif}$  per filament length and enhanced end severing with a rate per filament  $k_{sev}^{end}$  near the barbed end. If an oligomer is created from one of these severing events, we assume it can diffuse and anneal to a nearby filament end with rate constant  $k_{anneal}$ .

### Planar branching along lamellipodial plane sharpens the filament orientation pattern

Prior models of dendritic networks demonstrated how the  $\pm 35^\circ$  orientation with respect to the direction of protrusion depends on the relationship between filament elongation velocity  $v_{pol}$  and relative extension rate  $v_{net}$ . As shown in the results of the 2D model by Weichsel and Schwarz (Weichsel and Schwarz, 2010) in Fig. 2A, for low  $v_{net}/v_{pol}$ , the dominant orientation pattern has filaments branching at  $-70^\circ/0/70^\circ$ . Filaments oriented at angles larger than  $\theta_c$ , for which  $\cos(\theta_c) = v_{net}/v_{pol}$ , lose contact with the membrane since they are not polymerizing quick enough to catch up. When this critical angle becomes smaller than  $70^\circ$ , the favored pattern is filaments with orientations centered at  $\pm 35^\circ$ : the filament population around  $35^\circ$  can generate daughter branches at  $-35^\circ$  and vice versa; thus the population sustains itself even as individual filaments get capped. The  $-70^\circ/0/70^\circ$  was found to resume when  $v_{net}/v_{pol}$  exceeds the critical angle for  $35^\circ$ ; in this situation, only the  $0^\circ$  filaments polymerize quick enough to remain in the branching region. The above behavior can be quantified by the orientation order parameter, where a value 1 (or -1) indicates all filaments are in a  $-70^\circ/0/70^\circ$  (or  $\pm 35^\circ$ ) pattern.

By contrast to the above 2D results, dendritic network models formulated in 3D have provided apparently contradictory

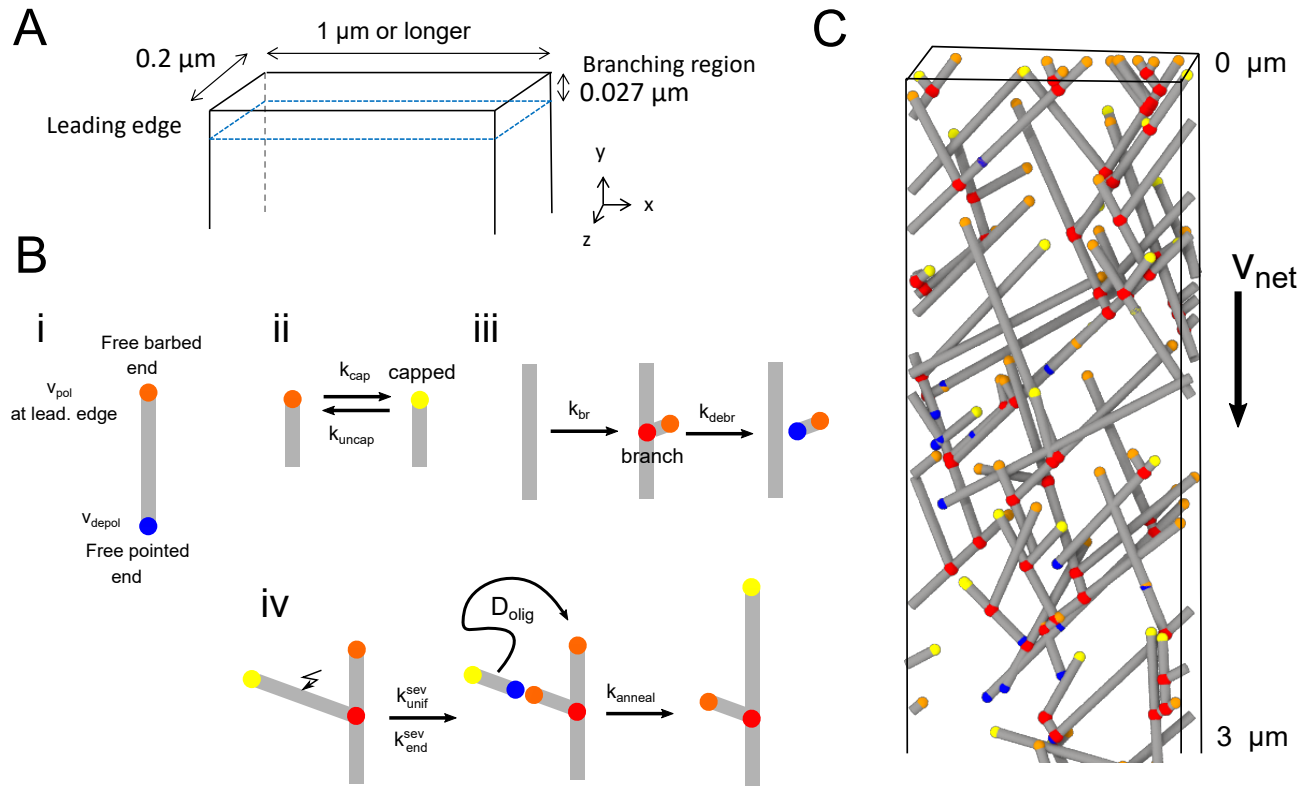

Figure 1: Three-dimensional model of the lamellipodial actin network. (A) Diagram of the simulation box near the leading edge, which is positioned at  $y = 0$  (in the reference frame of the cell) with an open boundary at  $y \rightarrow \infty$ . The thickness of the lamellipodium in the  $z$ -direction is  $0.2 \mu\text{m}$ . Periodic conditions are applied along the  $x$ -direction. Filaments cannot elongate past other boundaries (representing the plasma membrane), where they either stop polymerizing or undergo kinking to elongate along the boundary. (B) Cartoons of the processes in the simulation in which filaments are represented as line segments. (i) Polymerization at free barbed and depolymerization at free pointed ends. The polymerization rate of free barbed ends away from the leading edge is assumed to occur at a lower rate. (ii) Capping and uncapping of barbed ends. (iii) Branching at  $70^\circ$  occurs along a filament segment within the branching region. (iv) Severing occurs with uniform rate or with a rate enhanced close to barbed ends. If severing results in a fragment of length smaller than  $l_{max}^{olig}$ , the oligomer fragment is assumed to undergo diffusion with diffusion coefficient  $D_{olig}$  (not simulated explicitly). The diffusing oligomer can anneal to a nearby free barbed, or pointed end if the oligomer is uncapped. (C) Snapshot of a simulation. Relative speed of the network with respect to leading edge is  $v_{net}$ . Gray lines: actin filaments; red: Arp2/3 complex; yellow: free barbed ends; orange: capped barbed ends; blue: free pointed ends.

results (Holz and Vavylonis, 2018). Atilgan et al. (Atilgan et al., 2005) reported that obtaining the  $\pm 35^\circ$  pattern requires restricting branching to occur primarily along the lamellipodium plane, which they attributed to structural constraints of the branching machinery at the leading edge. Schreiber et al. (Schreiber et al., 2010) and Hu and Papoian (Hu and Papoian, 2010) however did observe the  $\pm 35^\circ$  pattern in 3D simulations, but the role of  $v_{net}/v_{pol}$  in determining the pattern was not examined.

As we are interested in structural aspects of lamellipodia, we performed systematic simulations in both 2D and 3D to examine the filament orientation pattern as function of  $v_{net}/v_{pol}$ . In the simulations of Fig. 2 we consider the region close to the leading edge where severing, annealing and debranching does not influence the resulting structure, and varied the polymerization rate while keeping  $v_{net}$  constant. We also kept the capping and branching rates  $k_{cap}$  and  $k_{br}$  fixed as the orientation pattern is robust with respect to their values (Weichsel and Schwarz, 2010).

We reproduce the results of Weichsel and Schwarz's 2D simulations (Weichsel and Schwarz, 2010) as a function of relative network growth speed, by imposing a tight planar branch restriction along the lamellipodial  $xy$  plane (Fig. 2A). Note that the transition among different orientation patterns is not abrupt at the critical angles, as a result of allowing fluctuations in branching angle and a finite size of the branching region. This is the reason for the largest difference occurring at high  $v_{net}/v_{pol}$ : because only filaments at small angles can keep up with the leading edge under these conditions, our simulation evolves to a narrow

Holz et al.

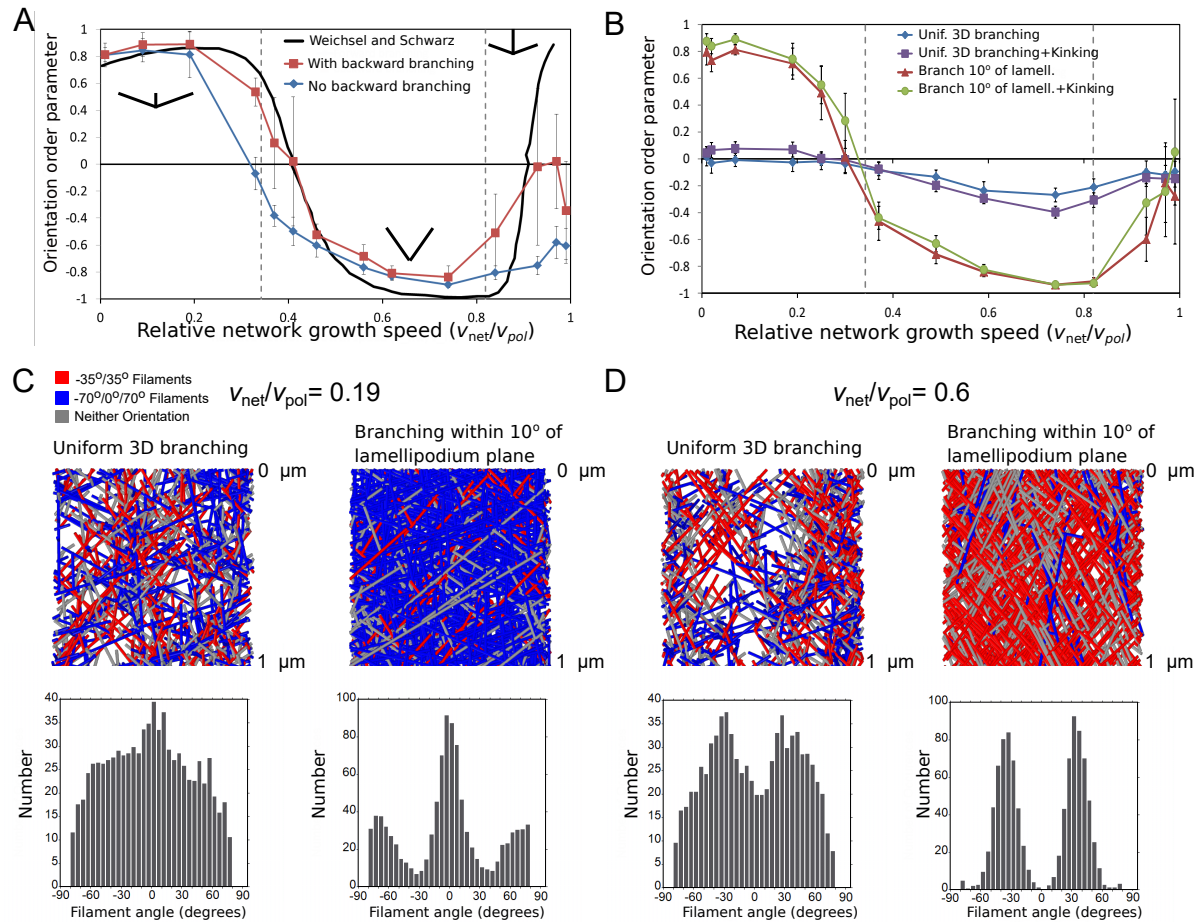

Figure 2: Steady state filament orientation patterns in 2D and 3D and dependence on planar branching restriction. (A) Orientation order parameter as a function of relative network growth speed,  $v_{net}/v_{pol}$  in a simulation where branching always occurs along the lamellipodium plane (within  $1^\circ$ ). Numerical data with or without backward branching are compared to numerical results in 2D without backward branching from Fig. S1A in Weichsel and Schwarz (Weichsel and Schwarz, 2010). For the plots,  $v_{net} = 0.05 \mu\text{m/s}$  was constant and  $v_{pol}$  was varied. An orientation order parameter equal to 1 indicates a network with all filaments in the  $-70^\circ/0^\circ/70^\circ$  orientation, while -1 indicates the  $\pm 35^\circ$  orientation. Vertical dashed lines indicate the critical  $v_{net}/v_{pol}$  for filaments at  $70^\circ$  and  $35^\circ$  along the lamellipodium plane. (B) Same as panel A but for a 3D simulation in which  $70^\circ$  branching occurs at random orientation or uniformly within  $10^\circ$  of the lamellipodium  $xy$  plane, without backward branching. The filament orientation is calculated from the filament projection along the  $xy$  lamellipodium plane. Uniform branching leads to a less ordered network, even when kinking of filaments hitting a boundary is implemented. (C) Top: 3D simulation snapshots, colored by orientation pattern, for  $v_{net}/v_{pol} = 0.19$  (no kinking). Bottom: orientation distribution of filaments with a portion located within  $1 \mu\text{m}$  of the leading edge, average of 5 simulations reaching steady state. Restricting branching along the lamellipodium plane sharpens the  $-70^\circ/0^\circ/70^\circ$  orientation pattern. (D) Same as panel C, for  $v_{net}/v_{pol} = 0.6$  (no kinking), showing that restricting branching along the lamellipodium plane sharpens the  $\pm 35^\circ$  orientation pattern. Parameters are as listed in Table 1 (keratocyte parameter set) with  $k_{unif}^{sev} = 10^{-5}$  sub/s, but with no oligomer annealing or enhanced end severing:  $k_{anneal} = k_{end}^{sev} = l_{max}^{olig} = 0$ .

comet-like branching structure where all branching is concentrated; this allows branching among  $\pm 35^\circ$  and other orientations (e.g.  $-80^\circ/-10^\circ/60^\circ$ ) to be maintained through double branching before filaments exit the branching region.

There is little difference in the orientation order parameter between simulations that allow backward branching (angles greater than  $80^\circ$ , chosen to include angles that would be oriented away from the leading edge considering the variation of branching angle for both orientation patterns) and branching limited toward the leading edge (Fig. 2A). Filaments that branch



backward exit the branching region quicker than filaments that branched forward, decreasing the likelihood of branches off of backward filaments. Even though backward-facing filaments contribute to angles larger than  $80^\circ$ , they do not influence the order parameter that does not measure them. Since backward branching does not affect the filament orientation pattern, and since backward-facing filaments are not seen in electron microscopy images (Mueller et al., 2017; Vinzenz et al., 2012), backward branching was not allowed in the rest of our simulations.

Next we allowed branching to occur uniformly in 3D (i.e. with equal probability along any azimuthal angle with respect to the axis of the parent filament) and studied the orientation order parameter as function of  $v_{net}/v_{pol}$  (Fig. 2B). The order parameter was measured using the angles of filaments projected along the lamellipodial  $xy$  plane. Uniform branching led to low and weakly-varying order parameter, unlike the sharp orientation pattern with distinct transitions observed in 2D. By comparison, a quasi-2D simulation with branching allowed to occur within  $10^\circ$  off the lamellipodial plane (close to the maximum off-plane angles observed in electron microscopy (Vinzenz et al., 2012) (A. Narita, personal communication, March 2018) restored the behavior observed in 2D.

In the simulations described so far, filament elongation was assumed to stop when the polymerizing barbed end reached the top or bottom  $z$  plane. To investigate the influence of filament bending along the membrane, we also performed simulations with filament “kinking,” in which filaments were allowed to continue their elongation parallel to the plane representing the top or bottom cell membrane. Allowing kinking lead to a high concentration of filaments along the top and bottom plane of the lamellipodium but did not however significantly influence the orientation order parameter (Fig. 2B).

To further visualize the network structure in simulations, Fig. 2C,D (and Fig. S1 for the case with kinking) show snapshots and filament orientation patterns at low and intermediate values of relative network growth speeds. The simulations with quasi-2D branching show clear  $-70^\circ/0^\circ/70^\circ$  and  $\pm 35^\circ$  respective orientation patterns. Interestingly, even though no prominent features are observed in simulations with uniform 3D branching at low relative network speeds (Fig. 2C), intermediate relative network speeds do show features at  $\pm 35^\circ$  (Fig. 2D). The latter histogram is not very different from experimentally-measured distributions (Koseki et al., 2019; Maly and Borisy, 2002; Vinzenz et al., 2012).

We thus conclude that the  $\pm 35^\circ$  pattern does occur within a broad range of relative network growth speeds with uniform 3D branching, however the peaks at  $\pm 35^\circ$  are not very pronounced. Indeed, the parameters used by Atilgan et al. (Atilgan et al., 2005) corresponded to  $v_{net} = 0.26 - 0.46$ , a parameter set that mostly lies outside the  $\pm 35^\circ$  region; this is likely the reason why the  $\pm 35^\circ$  was not observed in this study. Our results also suggest why Schreiber (Schreiber et al., 2010) who used  $v_{net} \approx 0.37$  and Hu and Papoian (Hu and Papoian, 2010) who had  $v_{net} = 0.45 - 0.51$ , did observe a  $\pm 35^\circ$  with uniform 3D branching.

Considering the simulation results as well as experimental evidence in electron tomograms for filaments oriented primarily along the lamellipodial plane (Vinzenz et al., 2012), for the rest of the simulations we proceed with the quasi-2D case where filament branching occurs within  $10^\circ$  of the lamellipodial plane and relative network growth speeds result in a  $\pm 35^\circ$  orientation pattern.

## Estimated Parameters

For both cases of keratocytes and XTC cells, which correspond to different values for  $v_{net}$ , we estimated the rates of polymerizing barbed end elongation  $v_{pol}$ , branching  $k_{br}$ , and capping  $k_{cap}$ , that are needed for a dendritic network with the anticipated concentration, branch length, and  $\pm 35^\circ$  filament orientation pattern (Table 1). We also assume that barbed ends can uncapped with rates comparable to those in SiMS lifetime measurements of capping protein (Miyoshi et al., 2006). The availability of such uncapped barbed ends for annealing is an important assumption of this work. We further use debranching rates by considering the lifetime of Arp2/3 complex components in SiMS (Miyoshi et al., 2006) and measurements of Arp2/3 complex profiles in lamellipodia (Iwasa and Mullins, 2007; Lai et al., 2008; Ryan et al., 2012).

We also assumed that uncapped barbed ends away from the leading edge do not elongate or shrink and that free pointed ends depolymerize with a rate  $v_{depol} = 5/s$ . The results we present below are robust with respect to small changes of these parameters, as long as the overall filament disassembly rate away from the leading edge is not reaching values comparable to  $v_{pol}$ . Maintaining a wide lamellipodium in the latter case would require a global treadmilling mechanism, which would contradict the evidence for distributed turnover. The assumption of slow barbed end dynamics away from the leading edge is consistent with the slow intensity increase in the back of lamellipodium after FRAP of actin (Smith et al., 2013) or after photoactivation of actin at the cell middle (Lai et al., 2008; Vitriol et al., 2015), as well as evidence that cofilin and twinfilin promote both barbed and pointed end depolymerization (Hakala et al., 2021; Johnston et al., 2015; Shekhar et al., 2020; Wioland et al., 2017).

A steady state with a finite lamellipodium depth is reached in the simulation whenever the net rate of depolymerization balances the net rate of polymerization at the leading edge. For example, in the case without enhanced end severing, annealing, or oligomer dissociation, the depth of the lamellipodium is determined by the rates of uniform severing,  $k_{unif}^{sev}$ , and  $v_{depol}$  (Fig. S2): in this case the fast growth of barbed ends at the leading edge is balanced by the slower depolymerization of a larger

Holz et al.

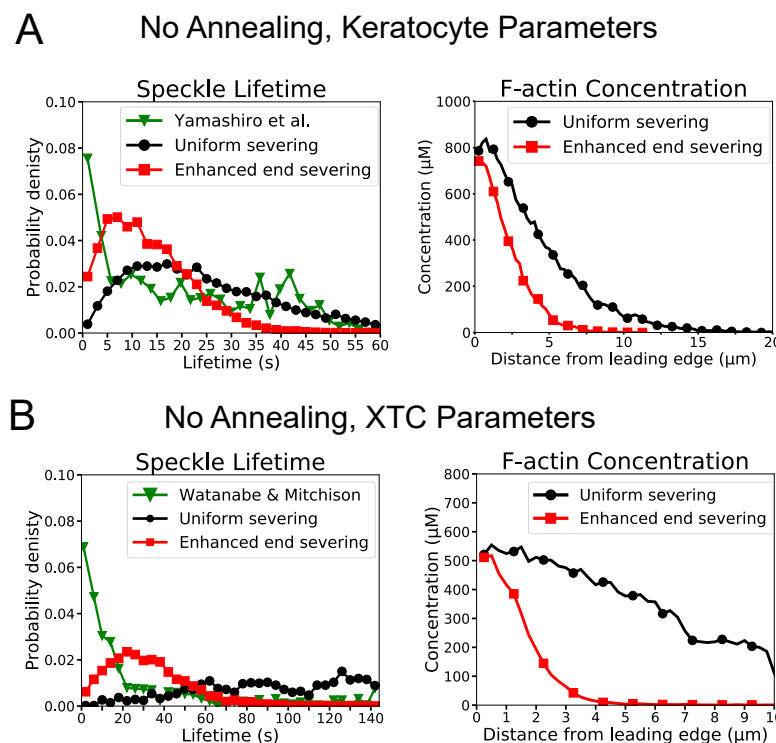

Figure 3: The model without annealing cannot reproduce both the actin speckle lifetime and F-actin concentration profiles. (A) Comparison of optimized parameters of model with uniform severing or model with enhanced barbed end severing to experiments in keratocytes. Left: Probability density of simulated actin speckle lifetimes and comparison to SiMS measurements in Yamashiro et al. (Yamashiro et al., 2014). Distributions were normalized between 2-60 s, to exclude short lifetimes beyond experimental resolution. Right: F-actin concentration profile for keratocyte parameters. Keratocyte parameters as in Table 1 with  $k_{unif}^{sev} = 10^{-4}$  /sub/s;  $l_{max}^{olig} = 40$  sub (black) and  $k_{unif}^{sev} = 5 \cdot 10^{-4}$  /sub/s;  $k_{end}^{sev} = 5 \cdot 10^{-4}$  /sub/s;  $l_{max}^{olig} = 80$  sub (red). Increasing the severing rate near the barbed end to better match the short speckle lifetime experimental peak leads to short lamellipodium. (B) Comparison of optimized parameters of model with uniform severing or model with enhanced barbed end severing to experiments XTC cells by Watanabe and Mitchison (Watanabe and Mitchison, 2002) (as they were corrected for photobleaching). Same as panel A, with probability density of speckle lifetimes normalized between 4-144 s. XTC parameters as in Table 1 with  $k_{anneal} = 0$ , and  $k_{unif}^{sev} = 10^{-5}$  sub/s;  $l_{max}^{olig} = 40$  sub (black) or  $k_{unif}^{sev} = 5 \cdot 10^{-4}$  /sub/s;  $k_{end}^{sev} = 10^{-4}$  /sub/s;  $l_{max}^{olig} = 80$  sub (red). Concentration profiles are the average of 5 simulations in steady state. Speckle lifetimes measured for speckles within 12 μm of the leading edge over a 20 s interval in steady state for 5 simulations.

number of pointed ends created by severing.

Given the parameters in Table 1, this leaves three main unknown parameters related to oligomer dissociation:  $k_{unif}^{sev}$ , the rate of uniform severing along each filament;  $l_{max}^{olig}$ , the longest length of a diffusing oligomer;  $k_{end}^{sev}$ , the enhanced severing rate near the barbed end (within  $l_{max}^{olig}$  of the end). We treated these three as fitting parameters and considered separately the cases in the presence or absence of annealing. In the absence of annealing, dissociating oligomers do not reincorporate into the network and are thus discarded from the simulation (corresponding to eventual disassembly into monomers, a process that we did not simulate).

## Model without annealing cannot reproduce both actin SiMS data and lamellipodial structure

We conducted a parameter search over the maximum oligomer size  $l_{max}^{olig}$  as well as end and uniform severing rates  $k_{end}^{sev}$ ,  $k_{unif}^{sev}$  for keratocyte- and XTC-like parameters without annealing (Fig. S3). We classified each parameter set in terms of how well it described the F-actin structure and concentration (including barbed end and branch concentration profiles), actin SiMS data (speckle lifetime distribution, appearance and disappearance profile), and if there was an increase in length between the

filaments located in 0-1  $\mu\text{m}$  and 3-4  $\mu\text{m}$  region (see Methods). Within a range of uniform and end severing rates, and short maximum oligomer lengths, the network structure and concentration of our simulation was close to that expected for keratocyte and XTC lamellipodium (Fig. S3). However, as expected, we did not find any parameter sets that resulted in a length increase since a mechanism for an increase in length and remodeling is not included. We also did not find any parameter set with a sharp peak at short actin speckle lifetimes, though in some cases the actin speckle lifetime distribution has a peak at relatively short times (Fig. S3).

To further demonstrate that the model without annealing cannot fit the experimental data, Figs. 3 and S4 contain examples of results for keratocyte and XTC parameters. In this and subsequent figures we color parameter sets black without end severing and red that include enhanced end severing; these curves correspond to the parameters of the scan that are highlighted with a thick frame of same color in Fig. S3. For the case with moderate uniform severing and no end severing, both the XTC and keratocyte uniform severing cases have a concentration profile that is comparable to lamellipodium of their respective parameter set (Fig. 3) as well as barbed end and branch distributions (Fig. S4). However, the actin speckle lifetimes do not peak at short lifetimes. With the addition of enhanced end severing, as well as increase of uniform severing, a peak at short lifetimes is observed that is closer to the experimental SiMS curves, however the lamellipodium becomes too narrow, there is a shortage of long speckle lifetimes compared to experiment, and the location of speckle appearances is restricted close the leading edge (Fig. 3 and Fig. S4A,F). In conclusion, the model without annealing cannot reproduce the distributed turnover, structure of actin network and increase in filament length.

### Model with oligomer annealing can reproduce lamellipodium structure, actin speckle dynamics and increase in filament length away from leading edge

Next, we examined if inclusion of oligomer annealing might be able to provide an adequate fit to the structure, speckle, and length increase criteria. We performed another parameter search over the maximum oligomer length, end and uniform severing rates ( $l_{max}^{olig}$ ,  $k_{end}^{sev}$ ,  $k_{unif}^{sev}$ ) for keratocyte and XTC parameter sets. For these simulations we used an annealing rate constant measured in crowded surfaces in vitro (Popp et al., 2007). Similar to the parameter scan without annealing, a match to F-actin structure and concentration was obtained when uniform and end severing rates were within a certain range (Fig. S5). The addition of annealing improved the agreement between the speckle lifetimes, appearance and disappearance location profiles compared to SiMS data, resulting in parameter sets that agree with both structure and speckle dynamics (Fig. S5). We also see that with high enough severing and maximum oligomer lengths, the filament length increases in a region away from the leading edge (Fig. S5). Parameter sets where all three fitting criteria are satisfied exist for both keratocyte and XTC cases, and all these triple matches have a finite enhanced end severing rate.

Detailed results from our parameter scan for keratocytes are shown in Fig. 4. This figure shows a case without enhanced end severing (black curves, double match in structure and speckles for keratocyte parameters) and with enhanced end severing (red, triple match in structure, speckles and filament length increase). Both parameter sets can reproduce the actin speckle dynamics as seen in the speckle lifetime, appearance and disappearance location distributions as well as the structure as seen in the F-actin, barbed end, and branch concentration profiles (Fig. 4A-F). However, only the case with enhanced end severing results in a simultaneous increase in length away from the leading edge (Fig. 4G). The increase brings the filament length close to the estimated average of 800 nm in keratocytes (Schaub et al., 2007). Snapshots and movies of the optimized simulations with enhanced end severing (Fig. 4H and Movie S1) clearly show more branches and shorter filaments in the region near the leading edge than away from the leading edge, similar to the electron micrographs of Svitkina et al. (Svitkina et al., 1997). The  $\pm 35^\circ$  filament orientation pattern is preserved throughout the lamellipodium in the presence of severing and annealing.

For XTC cells, enhanced end severing is needed to match the actin speckle lifetime distribution, which further contributes to filament length increase. Results from our parameter scan for XTC cells in Fig. 5 show a case without enhanced end severing (black curves, match in structure only) and a case with enhanced end severing (red, triple match in structure, speckles and filament length increase). The case with enhanced end severing provides a good overall fit to SiMS and structure (Fig. 4A-G), demonstrating increase in length away from the leading edge (Fig. 4G,H and Movie S2).

When performing the F-actin concentration and structure match for the XTC parameter sets we used numbers matching electron tomograms in fibroblasts by Vinzenz et al. (Vinzenz et al., 2012). These concentrations are about half of the estimated F-actin concentration of 1,000  $\mu\text{M}$  for XTC cells (Watanabe, 2010). The branching rate in the simulations of Fig. 5 corresponds to 0.05  $\mu\text{M s}^{-1}$ , which is also about half of the Arp2/3 complex nucleation rate of 0.11  $\mu\text{M s}^{-1}$  estimated by SiMS (Miyoshi et al., 2006; Watanabe, 2010). We checked that simulations with doubled the branching rate still provide a good fit to actin SiMS data as well as a length increase away from the leading edge, with F-actin concentration at the leading edge that was around 1,100  $\mu\text{M}$  (Fig. S6). We also tested that excluding end severing of polymerizing ends in Figs. 4 and 5 did not modify our results for the optimized parameter sets.

The optimized parameter sets with speckle dynamics similar to SiMS experiments of Fig. 4 and 5 also matched another

Holz et al.

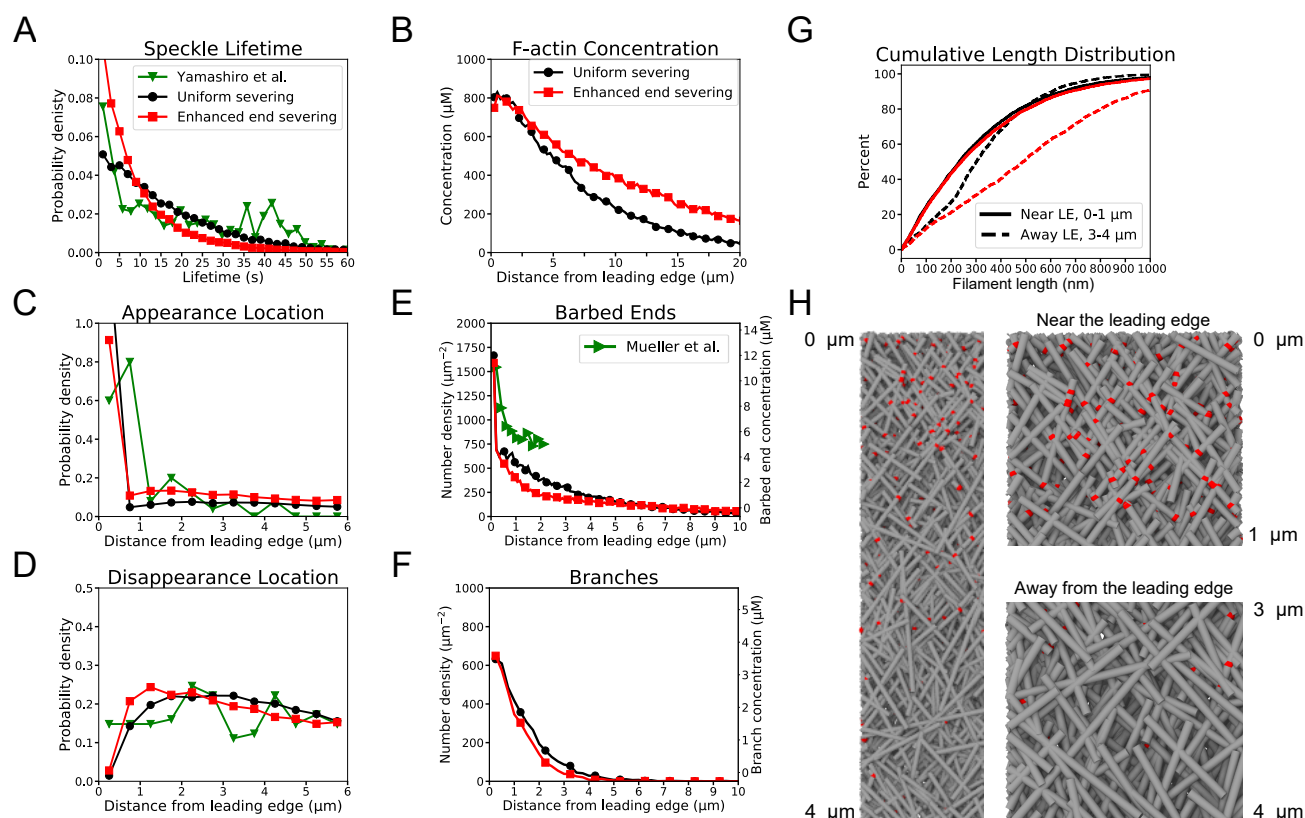

Figure 4: Model results for optimized parameters of model for keratocytes with uniform severing and annealing (black) or model with annealing and severing, enhanced near barbed end (red). The latter case provides good agreement with SiMS data, actin network structure, and filament length increase away from the leading edge. (A) Probability density of simulated actin speckle lifetimes and comparison to SiMS measurements in Yamashiro et al. (Yamashiro et al., 2014). Distributions were normalized between 2–60 s, to exclude short lifetimes beyond experimental resolution. (B) F-actin concentration profile. The oligomeric actin concentration (within 0–10 μm) was less than 0.1% of F-actin in that region. (C) Simulated actin speckle appearance location and comparison to Yamashiro et al. Distributions were normalized within the indicated range, considering speckles with lifetimes longer than 2 s. (D) Same as C, for disappearance location. (E) Distribution of barbed ends and comparison to measurements in Mueller et al. (Mueller et al., 2017). (F) Concentration of simulated Arp2/3 complex branches. (G) Cumulative filament length distributions near (0–1 μm, solid) and away from the leading edge (3–4 μm, dashed). (H) Snapshot of simulation with enhanced end severing (left). Zoomed in views close and away from the leading edge (right). Lamellipodium width is 1 μm. Gray lines: actin filaments; red: Arp2/3 complex. Parameters are listed in Table 1 (keratocyte parameters). The simulation with uniform severing used  $k_{unif}^{sev} = 5 \cdot 10^{-4}$  /sub/s;  $l_{max}^{olig} = 80$  sub and with enhanced end severing  $k_{unif}^{sev} = 5 \cdot 10^{-4}$  /sub/s;  $k_{end}^{sev} = 1 \cdot 10^{-3}$  sub/s;  $l_{max}^{olig} = 150$  sub. Data averaged over 5 independent simulations. Speckle data measured for speckles within 12 μm of the leading edge over a 20 s interval in steady state for 5 simulations.

observation from SiMS (Watanabe and Mitchison, 2002): the distribution of actin speckle lifetimes was weakly dependent on location of appearance with respect to the leading edge (Fig. S7).

The simulations of Fig. 4 and 5 also implement a mechanism of local oligomer rebinding, which is needed to match actin FRAP and photoactivation data (Smith and Liu, 2013; Vitriol et al., 2015): as shown in Fig. S7B and S7E the distance travelled by oligomers before annealing is in the sub-μm range. As a further check of consistency of our simulations with SiMS results, simulated actin SiMS for parameters with enhanced end severing of Fig. 4 (keratocytes) and Fig. 5 (XTC) do resemble experimental images from (Watanabe and Mitchison, 2002; Yamashiro et al., 2014) (Movies S3, S4). In Movies S3, S4, when an appearing and disappearing speckle are near one another, this is typically a reannealing event occurring quickly over short distances. We confirmed that events that might be limited by spatial and temporal resolution or interpreted as blinking in SiMS experiments correspond to a very small fraction of speckle appearances in the simulation.

Finally, we note that even though the results of this section were obtained for a specific value of annealing rate constant and



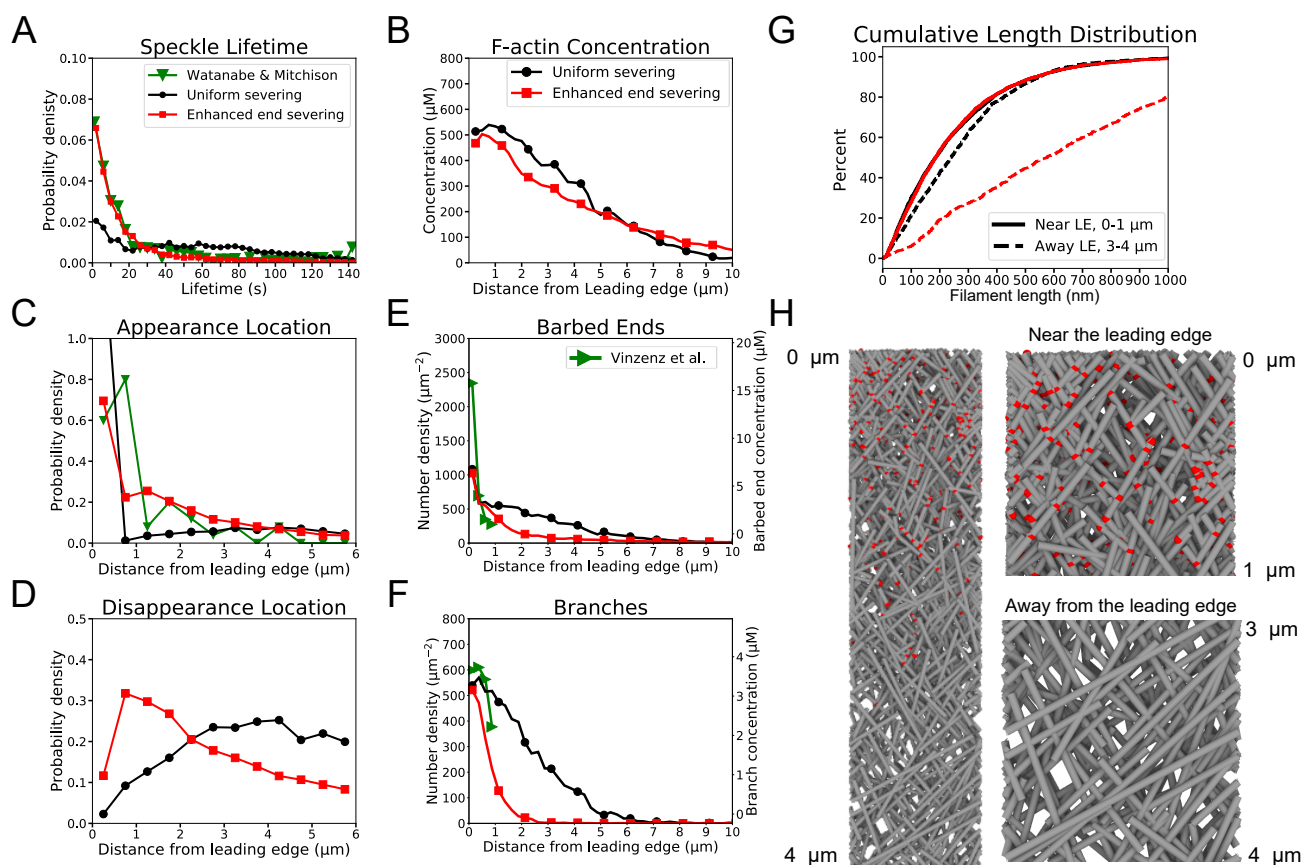

Figure 5: Model results for optimized parameters of model for XTC cells with uniform severing and annealing (black) or model with annealing and severing, enhanced near barbed end (red). The latter case provides good agreement with SiMS data and actin network structure; it can also lead to filament length increase away from the leading edge. (A-H) Panels are the same as Figure 4 but comparing to SiMS data of Watanabe and Mitchison (as they were corrected for photobleaching) (Watanabe and Mitchison, 2002) on XTC cells and structural data from fibroblasts by Vinzenz et al. (Vinzenz et al., 2012). In panel A, the distributions were normalized between 4-144 s. The fraction of oligomers is less than 0.1%. The simulation with uniform severing used  $k_{unif}^{sev} = 5 \cdot 10^{-5}$  /sub/s;  $l_{max}^{olig} = 80$  sub and with enhanced end severing  $k_{unif}^{sev} = 5 \cdot 10^{-6}$  /sub/s;  $k_{end}^{sev} = 10^{-3}$  /sub/s;  $l_{max}^{olig} = 150$  sub. Other parameters listed in Table 1 (XTC parameters).

oligomer diffusion coefficient, they remain valid as long as the annealing of oligomers occurs over a sufficiently short distance. We find that this is the case even for annealing rate constant that are lower by nearly two orders of magnitude compared to the values of Table 1 (Fig. S7C, S7F).

### Short speckle lifetimes provide evidence for rapid disassembly near barbed ends

The speckle lifetime distribution of the models with severing and annealing of Figs. 4-5 characteristically peaks at  $t = 0$ . This is a general feature of a barbed-end disassembly mechanism where newly-polymerized monomers are the ones that disassemble at higher rates, being closer to the barbed end. The experimental SiMS lifetimes in Figs. 3-5 used a temporal resolution of 1 s (Watanabe and Mitchison, 2002; Yamashiro et al., 2018). To probe the kinetics at even shorter lifetimes, SiMS of Dylight actin was repeated on XTC cells using the methods of Yamashiro et al. (Yamashiro et al., 2014), with a temporal resolution of 0.1 s. We measured actin speckles appearing near the leading edge, which should represent polymerization of actin monomers rather than oligomer annealing. Approximately 16% and 30% of speckles disappeared within 0.5 and 1 s, respectively (Fig. 6A). This large amount of short speckle lifetimes strongly supports frequent disassembly of newly polymerized F-actin near the barbed end.

To compare to simulations, Fig. 6B contains speckle lifetimes within 1  $\mu$ m of the leading edge for the XTC parameter set with enhanced end severing and annealing of Fig. 5 (the uniform severing case of Fig. 5 did not provide as good a match

Holz et al.

to SiMS measurements and is not shown). The speckle distribution extended to short lifetimes, similar to the experiments of Fig. 6A, with the percentage of lifetimes within 0.5 s and 1 s being 3 % and 7 %, respectively. Doubling the enhanced end severing rate while also choosing parameters that reproduced speckle dynamics, lamellipodial structure and an overall increase in length ( $k_{unif}^{sev} = 0$ ;  $k_{end}^{sev} = 2 \cdot 10^{-3}$  /sub/s;  $l_{max}^{olig} = 150$  sub, XTC parameters, Table 1), doubled the percentage of speckle short lifetimes within 0.5 s and 1 s to 7% and 14 %, respectively, closer to the experimental percentages of Fig. 6A. We conclude the short lifetimes of Fig. 6A are within the range of what is expected by an enhanced end severing mechanism, which may even occur at a rate 2-4 times faster than the estimate of Fig. 5.

Kueh et al. (Kueh et al., 2008) observed that actin disassembly in lamellipodia was inhibited in the presence of cytochalasin D (CD), a barbed end capper that also inhibits binding of cofilin to F-actin at high concentrations (Shoji et al., 2012). We tested the effect of CD treatment on XTC cells using SiMS (Fig. 6C). We confirmed CD's inhibitory effect on filament disassembly by observing a larger fraction of actin speckles that survive after CD treatment. These results provide further support for rapid disassembly of newly-polymerized actin at barbed ends (either through “bursting” as proposed in Kueh et al. (2008) or enhanced severing).

## DISCUSSION

We showed that the hypothesis of frequent severing and annealing (Miyoshi and Watanabe, 2013) provides a mechanism for distributed turnover and structural remodeling of the actin network. Using simulations based on the dendritic nucleation model, under conditions that allow self-organization into a  $\pm 35^\circ$  filament orientation pattern, we determined values for uniform and enhanced end severing rates that can simultaneously account for a diverse set of experimental data: (1) actin SiMS measurements (Smith et al., 2013; Watanabe and Mitchison, 2002; Yamashiro et al., 2018), (2) actin photobleaching and photoactivation experiments (Lai et al., 2008; Smith et al., 2013; Theriot and Mitchison, 1991; Vitriol et al., 2015) (since our model incorporates distributed turnover (Smith et al., 2013)), (3) the presence of uncapped barbed ends through the lamellipodium (Aroush et al., 2017; Miyoshi et al., 2006), and (4) the change of network structure of the lamellipodium as a function of distance to leading edge (Svitkina and Borisy, 1999).

Additionally, our simulations are consistent with SiMS of Arp2/3 complex (Millius et al., 2012) and capping protein (Miyoshi et al., 2006; Smith et al., 2011) in XTC cells. Agreement with SiMS of bound Arp2/3 complex lifetimes occurs because the speckle lifetimes correspond to a narrow distribution of branches as compared to the lamellipodium width (McMillen and Vavylonis, 2016), as in Fig. 5F. The model is also in agreement with SiMS measurements of capping protein lifetimes in XTC cells (Miyoshi et al., 2006), which were used as input to the uncapping rate constant. This uncapping is important in the model, to allow uncapped barbed ends for annealing. The presence of slowly diffusing oligomers assumed in the model could also be consistent with the presence of slowly diffusing capping proteins in XTC cell lamellipodia (Smith et al., 2011). For the parameters of Figs. 4-5, release of capped oligomers through end severing would not contribute significantly to capping protein SiMS lifetimes, since the corresponding rate is 4-8 times slower than uncapping.

It is also interesting to compare our model to SiMS measurement of Aip1 in XTC cells (Tsuji et al., 2009). Assuming that appearance of Aip1 speckles corresponds to filament disruption, the frequency of Aip1-associated filament disruption was estimated to be  $1.8 \mu\text{M s}^{-1}$  (Tsuji et al., 2009). We calculated the simulated overall effective severing rate by counting the total number of uniform and enhanced end severing within 20 s in steady state within  $5 \mu\text{m}$  from the leading edge (average of 5 simulations). For the enhanced end severing XTC case in Figs. 5 and S6, the effective severing rate was  $0.17 \mu\text{M s}^{-1}$  and  $0.32 \mu\text{M s}^{-1}$ , respectively. These values are a few times smaller, yet not too far from the experimental estimate. This difference could indicate an even higher enhanced end severing rate in cells as compared to Fig. 5, as also suggested by the comparison of experimental and simulated short actin lifetimes in Fig. 6A,B.

An alternative mechanism to explain the short actin SiMS lifetimes (different to enhanced end severing) is rapid disassembly through cooperative strand separation, which may occur in the presence of cofilin, coronin and Aip1, depending on the cofactor concentrations (Jansen et al., 2015; Kueh et al., 2008; Tang et al., 2020). If such a mechanism dominates in the region near the leading edge, maintenance of F-actin concentration would require monomer by monomer regrowth of some actin filaments by an equivalent amount. While we cannot fully exclude such a dynamic-instability-like mechanism, we note that: (1) it would require additional controls or homeostatic mechanisms to balance disassembly and reassembly away from the leading edge (while maintenance of F-actin mass is ensured by a severing and annealing mechanism), (2) ATP hydrolysis associated with ATP-actin monomer polymerization would be energetically more costly, and (3) reassembly of rapidly diffusing monomers away from the leading edge to recover bursting would also be less consistent with FRAP or photoactivation experiments (Smith et al., 2013; Vitriol et al., 2015).

Prior measurements of the intensity pattern of phalloidin-stained actin filaments in keratocytes treated with low doses of CD indicates shorter filaments compared to the control case (Schaub et al., 2007). This filament shortening could be due to capping by CD, as suggested (Schaub et al., 2007), however it may also be related to reduced structural remodeling of the

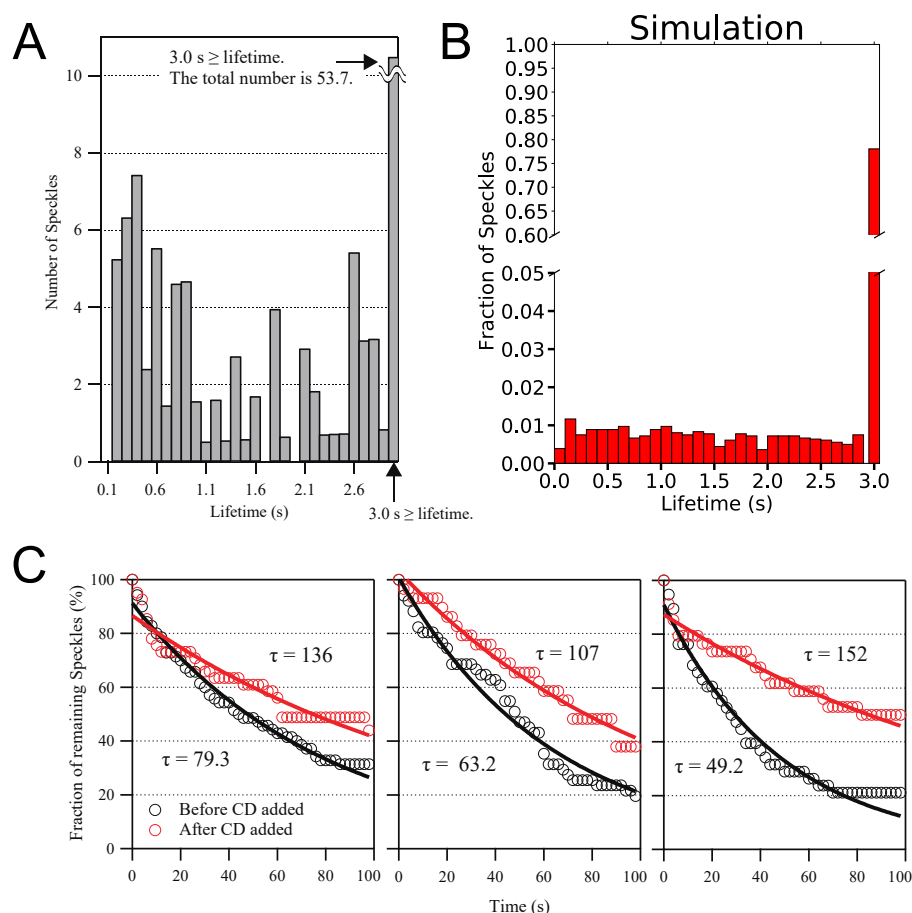

Figure 6: SiMS experiments support rapid disassembly of newly-assembled actin filaments near the leading edge, with disassembly inhibited by cytochalasin D. (A) Lifetime distribution of Dylight 550 actin speckles that appeared within  $\sim 0.5 \mu\text{m}$  of the leading edge of XTC lamellipodia, imaged for 10 s at 0.1 s/frame ( $n = 6$  cells, total number of speckles = 124). Lifetimes of 0.1 s are omitted as being beyond the temporal resolution limit. Right end bar indicates the sum of lifetime at 3 s or more. (B) Simulated actin speckle lifetime distribution for the case of enhanced end severing and annealing of XTC parameters in Fig. 5, except that end severing was allowed to occur on any barbed end, including polymerizing ones (which does not have any significant influence on the results of Fig. 5, see Fig. S8). The fraction of lifetimes longer than 3 s were 79 % (the fraction becomes 86 % if we exclude end severing of polymerizing ends). Lifetimes were averaged over 5 independent simulations and over 20 s in steady state for speckles within  $1 \mu\text{m}$  of the leading edge. (C) Disassembly rate of Dylight 550 actin speckles in lamellipodia of XTC cell decreased after treatment with 5  $\mu\text{M}$  cytochalasin D (CD). A number of speckles in a lamellipodia were identified in one reference frame, and the reduction in their numbers was followed over subsequent frames. Data are from three movies at 2 s intervals. Black and red lines are single exponential fits with decay time  $\tau$ . The increase of  $\tau$  after treatment is statistically significant ( $P = 0.03$ ; paired t-test).

lamellipodium through severing/destabilization near barbed ends.

Actin filament annealing, a basic assumption of our model, has been established in vitro (Andrianantoandro et al., 2001; Sept et al., 1999), including on a crowded surface which is similar to lamellipodial conditions (Popp et al., 2007). Our results are robust with respect to the annealing rate constant and oligomer diffusion coefficient, which is why we did not elaborate on the precise length dependence of oligomer diffusion and annealing rates. Specifically, the results are valid for a range of diffusion coefficients and annealing rate constants, as long as annealing is not dominated by reannealing to the same filament, diffusion is fast enough such that severing contributes to speckle disappearance in SiMS, and annealing does not occur further than approximately  $1 \mu\text{m}$  from the severing location. For example, the simulations results of Figs. 4-5 are nearly identical when reducing  $k_{\text{anneal}}$  by 10 times compared to the value used from Popp et al. (2007). This is because both annealing rates are in a range that allows the oligomers to diffuse away from the same severed filament and large enough for annealing to remodel the

Holz et al.

network. Future work is needed however to further investigate how diffusion and annealing of filament segments occurs within the dense lamellipodial actin mesh.

Our simulations showed how severing and depolymerization regulate the length of the lamellipodial dendritic network (Fig. S2), similar to earlier models that have been formulated at various levels of description (Berro et al., 2010; Carlsson, 2007; Ditlev et al., 2009; Edelstein-Keshet and Ermentrout, 2001; Lewalle et al., 2014; Manhart et al., 2019; Michalski and Carlsson, 2010, 2011; Mogilner and Edelstein-Keshet, 2002), including use of explicit dendritic network (Schreiber et al., 2010). We also included annealing, a process previously studied using lattice models by Carlsson and Michalski (Carlsson, 2007; Michalski and Carlsson, 2010, 2011). In their models, annealing was implemented as reappearance of lattice links and lead to a wider lamellipodium, similar to our findings. Annealing was also included in the partial differential equations model of Ditlev et al. (Ditlev et al., 2009) but the implications of this mechanism were not explicitly explored.

Closer to our work is the model by Huber et al. (Huber et al., 2008) who created a detailed 2D kinetic Monte Carlo model of the keratocyte lamellipodium to calculate the filament lengths and concentration profiles of actin and associated proteins. The model included diffusion of free actin monomers, filament nucleation along predefined  $\pm 35^\circ$  orientations to represent branching, permanent barbed end capping, binding of ADF/cofilin and tropomyosin to filaments, as well as ATP hydrolysis and  $P_i$  release. Annealing among filaments was also included, without explicit modeling of severed filament diffusion. With this model, two distinct network regions formed (termed the lamellipodium and lamella in that paper): a region with short filaments close to the leading edge, followed by a region with longer filaments starting at about  $2\ \mu\text{m}$  further away.

The length increase with distance from the leading edge in the model Huber et al. occurred via two different mechanisms: (i) filament annealing, or (ii) polymerization of barbed ends away from the leading edge, created by severing; these ends were assumed to polymerize faster than barbed ends at the leading edge, as a result of the higher G-actin concentration away from the leading edge. The annealing mechanism (i) of Huber et al. is different to what we described in our work: in their study it involved the joining together of any pair of filaments at the same distance from the leading edge, without accounting of the dendritic network topology. By contrast, we assumed annealing involves diffusing oligomers. Their work also involved annealing rate constants that were one to two orders of magnitude smaller than the values in this work, and, as we understand, it was assumed that annealing occurred even with capped barbed ends. An annealing mechanism as in Huber et al. would not contribute to actin speckle appearances and disappearances (that were not quantified in their paper) and is likely inconsistent with SiMS data. However we note that the Huber et al. model did lead to a peak in actin disassembly at  $1\text{--}2\ \mu\text{m}$  away from the leading edge, similar to Fig. 4D, as well as experimental results by qFSM in other cell types (Ponti et al., 2004). It's also unclear if fast polymerization away from the leading edge (mechanism (ii) in Huber et al.) is consistent with data using FRAP (Lai et al., 2008; Smith et al., 2013) and photoactivation (Vitriol et al., 2015) of actin in lamellipodia of other cell types. These experiments argue against incorporation of fast-diffusing actin at the back of the lamellipodium (Smith et al., 2013). We also note that when we included fast polymerization of barbed ends away from the leading edge in our simulations, we typically obtained a high F-actin concentration peak away from the leading edge, unlike in the simulations of Huber et al. or in prior experiments.

In a study of actin dynamics that combined experiment and modeling, Aroush et al. (Aroush et al., 2017) found evidence for the presence of a large pool of short actin oligomers in keratocyte lamellipodial fragments. Using FRAP on small regions, fluorescence correlation spectroscopy, and phalloidin labeling, the oligomer diffusion coefficient was estimated to be about  $5\ \mu\text{m}^2\text{s}^{-1}$  for oligomers with an average length of 13 subunits. Aroush et al. also report that two-thirds of actin within these fragments are diffuse, with oligomers composed a sizable fraction of this pool. A partial differential equation 1D model (that included polymerizable and non-polymerizable monomers, oligomers and F-actin) provided agreement with the data, assuming actin disassembly into oligomers throughout the lamellipodia and a broad distribution of polymerizing barbed ends. The finding of oligomers, as well as the proposed distributed F-actin turnover, is consistent with main assumptions of our work. However we note that the absence of local reassembly in the mechanism proposed by Aroush et al. may not easily explain experimental observations of actin FRAP or photoactivation over large regions of other cell types (Smith et al., 2013; Vitriol et al., 2015; Yamashiro et al., 2018), or the filament length increase across the lamellipodium. We also note that other studies (Kiuchi et al., 2011; Smith et al., 2013) have suggested much smaller concentrations of diffuse actin in lamellipodia compared to Aroush et al., though the situation could be different in the faster keratocytes (Yamashiro et al., 2018) and their fragments.

The mechanism of severing and annealing modeled in this work could represent a general feature of actin dendritic networks, including yeast cells where short actin speckle lifetimes have been observed in actin patches of fission yeast (Lacy et al., 2019). It might provide an energetically efficient mechanism for network remodeling matching different mechanical requirements: close to the leading edge, short branched networks would provide rigidity to compressive stresses (resulting from actin polymerization against the membrane) while longer filaments at the back might be better suited for extensional stresses through myosin motors. Future work is however needed to clarify the biochemical basis of the proposed kinetics, taking into account the energetic requirements associated with ATP hydrolysis and  $P_i$  release along actin filaments, as well as mechanics and kinetics of actin filament side-binding proteins such as cofilin, GMF, and tropomyosin.



## **ACKNOWLEDGMENTS**

We thank David Rutkowski for helping with network visualization. This work was supported by National Institutes of Health Grant R01GM114201 and R35GM136372. Use of the high-performance computing capabilities of the Extreme Science and Engineering Discovery Environment (XSEDE), which is supported by the National Science Foundation, project no. TG-MCB180021 is also gratefully acknowledged.

## **AUTHOR CONTRIBUTIONS**

DH, ARH and DV designed modeling research. DH and ARH wrote code and performed analysis, with input from DV. EU, SY, and NW performed experiments and wrote the experimental section of the manuscript. DH and DV wrote the main body of the manuscript, with input from all authors.

## **COMPETING INTERESTS**

The authors declare no competing interests.

Holz et al.

## REFERENCES

- Andrianantoandro, E., Blanchoin, L., Sept, D., McCammon, J. A. and Pollard, T. D. (2001). Kinetic mechanism of end-to-end annealing of actin filaments. *Journal of molecular biology* 312, 721–730.
- Andrianantoandro, E. and Pollard, T. D. (2006). Mechanism of actin filament turnover by severing and nucleation at different concentrations of ADF/cofilin. *Mol. Cell* 24, 13–23.
- Aroush, D. R.-B., Ofer, N., Abu-Shah, E., Allard, J., Krichevsky, O., Mogilner, A. and Keren, K. (2017). Actin Turnover in Lamellipodial Fragments. *Current Biology* 27, 2963–2973.
- Atilgan, E., Wirtz, D. and Sun, S. X. (2005). Morphology of the lamellipodium and organization of actin filaments at the leading edge of crawling cells. *Biophysical journal* 89, 3589–3602.
- Bailly, M., Macaluso, F., Cammer, M., Chan, A., Segall, J. E. and Condeelis, J. S. (1999). Relationship between Arp2/3 complex and the barbed ends of actin filaments at the leading edge of carcinoma cells after epidermal growth factor stimulation. *The Journal of cell biology* 145, 331–345.
- Berro, J., Sirotkin, V. and Pollard, T. D. (2010). Mathematical Modeling of Endocytic Actin Patch Kinetics in Fission Yeast: Disassembly Requires Release of Actin Filament Fragments. *Molecular Biology of the Cell* 21, 2905–2915.
- Blanchoin, L., Boujemaa-Paterski, R., Sykes, C. and Plastino, J. (2014). Actin dynamics, architecture, and mechanics in cell motility. *Physiol Rev* 94, 235–263.
- Carlier, M.-F. and Shekhar, S. (2017). Global treadmilling coordinates actin turnover and controls the size of actin networks. *Nature Reviews Molecular Cell Biology* 18, 389–401.
- Carlsson, A. E. (2007). Disassembly of actin networks by filament severing. *New J. Phys.* 9, 418.
- Carlsson, A. E. (2010). Actin dynamics: from nanoscale to microscale. *Annu Rev Biophys* 39, 91–110.
- Danuser, G. and Waterman-Storer, C. M. (2006). Quantitative Fluorescent Speckle Microscopy of Cytoskeleton Dynamics. *Annu. Rev. Biophys. Biomol. Struct.* 35, 361–87.
- Ditlev, J. A., Vacanti, N. M., Novak, I. L. and Loew, L. M. (2009). An open model of actin dendritic nucleation. *Biophys J* 96, 3529–3542.
- Edelstein-Keshet, L. and Ermentrout, G. B. (2001). A model for actin-filament length distribution in a lamellipod. *Journal of Mathematical Biology* 43, 325–355.
- Gong, B., Lin, J. and Qian, J. (2017). Growing actin networks regulated by obstacle size and shape. *Acta Mechanica Sinica* 33, 222–233.
- Hakala, M., Wioland, H., Tolonen, M., Kotila, T., Jegou, A., Romet-Lemonne, G. and Lappalainen, P. (2021). Twinfilin uncaps filament barbed ends to promote turnover of lamellipodial actin networks. *Nature Cell Biology* 23, 147–159.
- Holz, D. and Vavylonis, D. (2018). Building a dendritic actin filament network branch by branch: models of filament orientation pattern and force generation in lamellipodia. *Biophysical Reviews* 10, 1577–1585.
- Hu, L. and Papoian, G. A. (2010). Mechano-chemical feedbacks regulate actin mesh growth in lamellipodial protrusions. *Biophys J* 98, 1375–1384.
- Huber, F., Käs, J. and Stuhmann, B. (2008). Growing actin networks form lamellipodium and lamellum by self-assembly. *Biophys J* 95, 5508–5523.
- Iwasa, J. H. and Mullins, R. D. (2007). Spatial and temporal relationships between actin-filament nucleation, capping, and disassembly. *Curr Biol* 17, 395–406.
- Jansen, S., Collins, A., Chin, S. M., Ydenberg, C. A., Gelles, J. and Goode, B. L. (2015). Single-molecule imaging of a three-component ordered actin disassembly mechanism. *Nat Commun* 6, 7202.
- Johnston, A. B., Collins, A. and Goode, B. L. (2015). High-speed depolymerization at actin filament ends jointly catalysed by Twinfilin and Srv2/CAP. *Nature Cell Biology* 17, 1504–1511.

- Keren, K., Pincus, Z., Allen, G. M., Barnhart, E. L., Marriott, G., Mogilner, A. and Theriot, J. A. (2008). Mechanism of shape determination in motile cells. *Nature* 453, 475–480.
- Kiuchi, T., Nagai, T., Ohashi, K. and Mizuno, K. (2011). Measurements of spatiotemporal changes in G-actin concentration reveal its effect on stimulus-induced actin assembly and lamellipodium extension. *J Cell Biol* 193, 365–380.
- Koseki, K., Taniguchi, D., Yamashiro, S., Mizuno, H., Vavylonis, D. and Watanabe, N. (2019). Lamellipodium tip actin barbed ends serve as a force sensor. *Genes to Cells* 24, 705–718.
- Kueh, H. Y., Charras, G. T., Mitchison, T. J. and Brieher, W. M. (2008). Actin disassembly by cofilin, coronin, and Aip1 occurs in bursts and is inhibited by barbed-end cappers. *Journal of Cell Biology* 182, 341–353.
- Lacy, M. M., Baddeley, D. and Berro, J. (2019). Single-molecule turnover dynamics of actin and membrane coat proteins in clathrin-mediated endocytosis. *eLife* 8, e52355.
- Lai, F. P. L., Szczodrak, M., Block, J., Faix, J., Breitsprecher, D., Mannherz, H. G., Stradal, T. E. B., Dunn, G. A., Small, J. V. and Rottner, K. (2008). Arp2/3 complex interactions and actin network turnover in lamellipodia. *EMBO J* 27, 982–992.
- Lewalle, A., Fritzsche, M., Wilson, K., Thorogate, R., Duke, T. and Charras, G. (2014). A phenomenological density-scaling approach to lamellipodial actin dynamics. *Interface Focus* 4, 20140006.
- Maly, I. V. and Borisy, G. G. (2002). Self-organization of treadmilling microtubules into a polar array. *Trends Cell Biol* 12, 462–465.
- Manhart, A., Icheva, T. A., Guerin, C., Klar, T., Boujemaa-Paterski, R., Thery, M., Blanchoin, L. and Mogilner, A. (2019). Quantitative regulation of the dynamic steady state of actin networks. *eLife* 8, e42413.
- McCullough, B. R., Blanchoin, L., Martiel, J.-L. and la Cruz, E. M. D. (2008). Cofilin increases the bending flexibility of actin filaments: implications for severing and cell mechanics. *J Mol Biol* 381, 550–558.
- McMillen, L. M. and Vavylonis, D. (2016). Model of turnover kinetics in the lamellipodium: implications of slow-and fast-diffusing capping protein and Arp2/3 complex. *Physical biology* 13, 066009.
- Michalski, P. J. and Carlsson, A. E. (2010). The effects of filament aging and annealing on a model lamellipodium undergoing disassembly by severing. *Phys Biol* 7, 026004.
- Michalski, P. J. and Carlsson, A. E. (2011). A model actin comet tail disassembling by severing. *Physical Biology* 8, 046003.
- Millius, A., Watanabe, N. and Weiner, O. D. (2012). Diffusion, capture and recycling of SCAR/WAVE and Arp2/3 complexes observed in cells by single-molecule imaging. *J Cell Sci* 125, 1165–1176.
- Miyoshi, T., Tsuji, T., Higashida, C., Hertzog, M., Fujita, A., Narumiya, S., Scita, G. and Watanabe, N. (2006). Actin turnover-dependent fast dissociation of capping protein in the dendritic nucleation actin network: evidence of frequent filament severing. *J Cell Biol* 175, 947–955.
- Miyoshi, T. and Watanabe, N. (2013). Can filament treadmilling alone account for the F-actin turnover in lamellipodia? *Cytoskeleton* 70, 179–190.
- Mogilner, A. and Edelstein-Keshet, L. (2002). Regulation of actin dynamics in rapidly moving cells: a quantitative analysis. *Biophys J* 83, 1237–1258.
- Mueller, J., Szep, G., Nemethova, M., de Vries, I., Lieber, A. D., Winkler, C., Kruse, K., Small, J. V., Schmeiser, C., Keren, K., Hauschild, R. and Sixt, M. (2017). Load Adaptation of Lamellipodial Actin Networks. *Cell* 171, 188–200.e16.
- Okada, K., Blanchoin, L., Abe, H., Chen, H., Pollard, T. D. and Bamburg, J. R. (2002). Xenopus actin-interacting protein 1 (XAip1) enhances cofilin fragmentation of filaments by capping filament ends. *The Journal of biological chemistry* 277, 43011–43016.
- Pollard, T. D. and Borisy, G. G. (2003). Cellular motility driven by assembly and disassembly of actin filaments. *Cell* 112, 453–465.

Holz et al.

- Ponti, A., Machacek, M., Gupton, S. L., Waterman-Storer, C. M. and Danuser, G. (2004). Two distinct actin networks drive the protrusion of migrating cells. *Science* 305, 1782–1786.
- Popp, D., Yamamoto, A. and Maéda, Y. (2007). Crowded Surfaces Change Annealing Dynamics of Actin Filaments. *Journal of Molecular Biology* 368, 365 – 374.
- Ryan, G. L., Petroccia, H. M., Watanabe, N. and Vavylonis, D. (2012). Excitable actin dynamics in lamellipodial protrusion and retraction. *Biophys J* 102, 1493–1502.
- Schaub, S., Meister, J.-J. and Verkhovsky, A. B. (2007). Analysis of actin filament network organization in lamellipodia by comparing experimental and simulated images. *J. Cell Sci.* 120, 1491–1500.
- Schaus, T. E., Taylor, E. W. and Borisy, G. G. (2007). Self-organization of actin filament orientation in the dendritic-nucleation/array-treadmilling model. *Proceedings of the National Academy of Sciences* 104, 7086–7091.
- Schreiber, C. H., Stewart, M. and Duke, T. (2010). Simulation of cell motility that reproduces the force-velocity relationship. *Proc Natl Acad Sci U S A* 107, 9141–9146.
- Sept, D., Xu, J., Pollard, T. D. and Andrew McCammon, J. (1999). Annealing Accounts for the Length of Actin Filaments Formed by Spontaneous Polymerization. *Biophysical Journal* 77, 2911 – 2919.
- Shekhar, S. and Carlier, M.-F. (2017). Enhanced Depolymerization of Actin Filaments by ADF/Cofilin and Monomer Funneling by Capping Protein Cooperate to Accelerate Barbed-End Growth. *Current Biology* 27, 1990–1998.e5.
- Shekhar, S., Hoeprich, G. J., Gelles, J. and Goode, B. L. (2020). Twinfilin bypasses assembly conditions and actin filament aging to drive barbed end depolymerization. *J Cell Biol* 220.
- Shoji, K., Ohashi, K., Sampei, K., Oikawa, M. and Mizuno, K. (2012). Cytochalasin D acts as an inhibitor of the actin–cofilin interaction. *Biochem Biophys Res Commun* 424, 52–57.
- Smith, D. B. and Liu, J. (2013). Branching and capping determine the force-velocity relationships of branching actin networks. *Phys Biol* 10, 016004.
- Smith, M. B., Karatekin, E., Gohlke, A., Mizuno, H., Watanabe, N. and Vavylonis, D. (2011). Interactive, computer-assisted tracking of speckle trajectories in fluorescence microscopy: application to actin polymerization and membrane fusion. *Biophys J* 101, 1794–1804.
- Smith, M. B., Kiuchi, T., Watanabe, N. and Vavylonis, D. (2013). Distributed actin turnover in the lamellipodium and FRAP kinetics. *Biophys J* 104, 247–257.
- Svitkina, T. M. and Borisy, G. G. (1999). Arp2/3 complex and actin depolymerizing factor/cofilin in dendritic organization and treadmilling of actin filament array in lamellipodia. *The Journal of cell biology* 145, 1009–1026.
- Svitkina, T. M., Verkhovsky, A. B., McQuade, K. M. and Borisy, G. G. (1997). Analysis of the actin-myosin II system in fish epidermal keratocytes: mechanism of cell body translocation. *The Journal of cell biology* 139, 397–415.
- Tang, V. W., Nadkarni, A. V. and Briehar, W. M. (2020). Catastrophic actin filament bursting by cofilin, Aip1, and coronin. *Journal of Biological Chemistry* 295, 13299–13313.
- Theriot, J. A. and Mitchison, T. J. (1991). Actin microfilament dynamics in locomoting cells. *Nature* 352, 126–131.
- Tsuji, T., Miyoshi, T., Higashida, C., Narumiya, S. and Watanabe, N. (2009). An order of magnitude faster AIP1-associated actin disruption than nucleation by the Arp2/3 complex in lamellipodia. *PLoS One* 4, e4921.
- Vinzenz, M., Nemethova, M., Schur, F., Mueller, J., Narita, A., Urban, E., Winkler, C., Schmeiser, C., Koestler, S. A., Rottner, K., Resch, G. P., Maeda, Y. and Small, J. V. (2012). Actin branching in the initiation and maintenance of lamellipodia. *Journal of cell science* 125, 2775–2785.
- Vitriol, E. A., McMillen, L. M., Kapustina, M., Gomez, S. M., Vavylonis, D. and Zheng, J. Q. (2015). Two functionally distinct sources of actin monomers supply the leading edge of lamellipodia. *Cell Rep* 11, 433–445.



- Volkman, N. (2001). Structure of Arp2/3 Complex in Its Activated State and in Actin Filament Branch Junctions. *Science* 293, 2456–2459.
- Watanabe, N. (2010). Inside view of cell locomotion through single-molecule: fast F-/G-actin cycle and G-actin regulation of polymer restoration. *Proc Jpn Acad Ser B Phys Biol Sci* 86, 62–83.
- Watanabe, N. and Mitchison, T. J. (2002). Single-molecule speckle analysis of actin filament turnover in lamellipodia. *Science* 295, 1083–1086.
- Weichsel, J. and Schwarz, U. S. (2010). Two competing orientation patterns explain experimentally observed anomalies in growing actin networks. *Proceedings of the National Academy of Sciences* 107, 6304–6309.
- Wioland, H., Guichard, B., Senju, Y., Myram, S., Lappalainen, P., Jégou, A. and Romet-Lemonne, G. (2017). ADF/cofilin accelerates actin dynamics by severing filaments and promoting their depolymerization at both ends. *Current Biology* 27, 1956–1967.
- Yamashiro, S., Mizuno, H., Smith, M. B., Ryan, G. L., Kiuchi, T., Vavylonis, D. and Watanabe, N. (2014). New single-molecule speckle microscopy reveals modification of the retrograde actin flow by focal adhesions at nanometer scales. *Mol Biol Cell* 25, 1010–1024.
- Yamashiro, S., Tanaka, S., McMillen, L. M., Taniguchi, D., Vavylonis, D. and Watanabe, N. (2018). Myosin-dependent actin stabilization as revealed by single-molecule imaging of actin turnover. *Molecular Biology of the Cell* 29, 1941–1947.

Holz et al.

| Parameter        | Name                                          | Keratocyte Value        | XTC Value              | Reference/Justification                                                        |
|------------------|-----------------------------------------------|-------------------------|------------------------|--------------------------------------------------------------------------------|
| $v_{pol}$        | Polymerization rate at leading edge           | 150 sub $s^{-1}$        | 38 sub $s^{-1}$        | Matches observed protrusion rate                                               |
| $v_{depol}$      | Pointed end depolymerization rate             | 5 sub $s^{-1}$          | 5 sub $s^{-1}$         | <a href="#">Johnston et al. (2015)</a> ; <a href="#">Wioland et al. (2017)</a> |
| $k_{cap}$        | Capping rate                                  | 0.6 $s^{-1}$            | 0.2 $s^{-1}$           | Estimated (Methods)                                                            |
| $k_{uncap}$      | Uncapping rate                                | 1.0 $s^{-1}$            | 1.0 $s^{-1}$           | <a href="#">Miyoshi et al. (2006)</a>                                          |
| $k_{br}$         | Branching rate                                | 150 $s^{-1} \mu m^{-1}$ | 30 $s^{-1} \mu m^{-1}$ | Estimated (Methods)                                                            |
| $k_{debr}$       | Debranching rate                              | 0.1 $s^{-1}$            | 0 *                    | <a href="#">Lai et al. (2008)</a> ; <a href="#">Miyoshi et al. (2006)</a>      |
| $v_{net}$        | Network velocity with respect to leading edge | 0.2 $\mu m s^{-1}$      | 0.05 $\mu m s^{-1}$    |                                                                                |
| $k_{unif}^{sev}$ | Uniform severing rate                         | Varied                  | Varied                 |                                                                                |
| $k_{end}^{sev}$  | Severing rate near barbed end                 | Varied                  | Varied                 |                                                                                |
| $k_{anneal}$     | Annealing rate constant                       | 60 $\mu M^{-1} s^{-1}$  | 60 $\mu M^{-1} s^{-1}$ | Close to <a href="#">Popp et al. (2007)</a>                                    |
| $l_{max}^{olig}$ | Maximum oligomer size                         | Varied                  | Varied                 |                                                                                |
| $D_{olig}$       | Oligomer diffusion coefficient                | 0.25 $\mu m^2 s^{-1}$   | 0.25 $\mu m^2 s^{-1}$  | Estimated                                                                      |

Table 1: Parameter table for simulations. \* Since severing and depolymerization contributed to debranching in XTC cells, we did not include a separate debranching rate constant.

## MATERIALS AND METHODS

### Simulation

We developed a three-dimensional stochastic simulation of the actin network within the lamellipodium (Fig. 1). Actin filaments are represented as straight lines without excluded volume, within the simulation box. We work in the coordinate system where the leading edge is at rest. For the purposes of this work we do not consider explicitly the effects of ATP hydrolysis, diffusion of the actin monomer pool, or excluded volume interactions among filaments. The leading edge at  $y = 0$ , as well as the lamellipodium top and bottom at  $z = 0$  and  $z = 0.2 \mu\text{m}$  are hard boundaries. There is no boundary at  $y \rightarrow -\infty$ , allowing the mechanisms and rate constants of the system to determine the length of the lamellipodium. Periodic boundary conditions with length at least  $1 \mu\text{m}$  are applied in the  $x$ -direction. A constant relative velocity,  $v_{net}$ , is imposed between the network and the leading edge. The network is initialized by filament seeds of 5 subunits in length at random orientations near the leading edge. The probability of a reaction event (polymerization, depolymerization, capping, uncapping, branching, severing and annealing) is calculated using the corresponding rates or rate constants as described below and in Table 1. The time step was  $dt = 0.002 \text{ s}$ .

### Mechanisms

#### Polymerization, depolymerization, capping and uncapping

Free barbed ends, which are created by branching at the leading edge polymerize with rate  $v_{pol}$ . Polymerization (elongation) is simulated as stochastic increase of filament length by 2.7 nm, corresponding to addition of one monomer, when this is allowed by the distance to the hard boundaries at  $z = 0$ ,  $z = 0.2 \mu\text{m}$ , or  $y = 0$ . We examined two different scenarios when an elongating filament reaches  $z = 0$  or  $z = 0.2 \mu\text{m}$ : (i) the filaments stop polymerizing, or (ii) undergo “kinking,” namely they continue elongation parallel to  $z = 0$  or  $z = 0.2 \mu\text{m}$ , at the same angle along the  $xy$  plane. The latter is implemented to mimic bending of filaments when they come in contact with the membrane. Capping of free barbed ends occurs at a rate  $k_{cap}$ , which stops polymerization and does not allow annealing of oligomers. Capped barbed ends become free with uncapping rate,  $k_{uncap}$ . Free barbed ends away from the leading edge are expected to undergo different polymerization kinetics compared to barbed end at the leading edge, where membrane bound proteins such as Ena/VASP catalyze fast elongation. Recent evidence suggests that ADF/cofilin and twinfilin may assist in the depolymerization of barbed ends away from the leading edge at a slow rate (Hakala et al., 2021; Johnston et al., 2015; Shekhar et al., 2020; Wioland et al., 2017). For simplicity, and accounting for these recent observations, barbed ends formed by uncapping neither polymerize or depolymerize, still allowing however annealing of oligomers. Free pointed ends (created by severing or debranching) depolymerize with rate  $v_{depol}$ , implemented by stochastic length decrease by 2.7 nm corresponding to one monomer. Depolymerization stops when the filament completely depolymerizes or meets the qualifications for an oligomer. These mechanisms are depicted in Fig. 1B.

#### Branching and debranching

Filament branches are nucleated at a total rate  $k_{br}$  and placed randomly along parent filaments, in proportion to their segment length within the branching region, a 27 nm region near the leading edge (Fig. 1A), approximately the size of an Arp2/3 complex associated to proteins on the cell membrane (Volkman, 2001). New branches form from an existing parent filament at an angle chosen from a Gaussian distribution centered at  $70^\circ$  with a standard deviation of  $5^\circ$  (Gong et al., 2017; Weichsel and Schwarz, 2010). The azimuthal angle of the branch around the axis of the parent filament is either picked from a uniform distribution (uniform 3D branching) or else uniformly but with the additional condition that the angle between the branch and the lamellipodium plane is smaller than a threshold value (typically  $10^\circ$ , case of branching along lamellipodium plane). Unless otherwise indicated, branching at angles larger than  $80^\circ$  with respect to the axis of protrusion (termed “backward” branching) is not allowed; in cases where an invalid orientation is selected, a new branch location and orientation is tried. Debranching occurs at rate  $k_{debr}$ , which we assume results in release of the Arp2/3 complex, leading to a free pointed end for the debranched filament. In simulations with  $k_{debr} = 0$ , debranching was assumed to occur for branches that become 5 monomers or smaller and do not contain branches of their own. Debranching also occurs when the pointed end of a parent filament depolymerizes past a branch.

#### Severing

We considered uniform severing with constant rate  $k_{unif}^{sev}$  per filament length, and enhanced severing near the barbed end with rate per filament length  $k_{end}^{sev}$  (proposed as possible explanation for the short actin lifetimes observed by SiMS (Miyoshi et al., 2006)). Enhanced end severing occurred between the barbed end and  $l_{max}^{olig}$ , the longest length for an oligomer. In a severing event, a location on the filament is chosen to split the filament into two, creating a new depolymerizing pointed end and a free barbed end. An oligomer, assumed to be diffusing as discussed below, is created for any filament segment that is shorter than

Holz et al.

$I_{max}^{olig}$  and is not a branch or does not contain a branch. Oligomers formed at the barbed end retain the capped or polymerization state of the original filament. To allow a network to form even at high severing rates, we assumed that no severing occurs within  $0.1 \mu\text{m}$  of the leading edge and did not apply enhanced end severing to barbed ends polymerizing at the leading edge (unless otherwise indicated). The latter assumption does not have a significant effect on our final results.

## Oligomers and Annealing

Since oligomers are short and typically anneal after a short time interval, we assumed that they do not branch, sever, or depolymerize, though we implemented capping and uncapping with the same rates as filaments. We assume that the probability of finding the end of a non-annealed oligomer displaced by distance  $\delta x$  and  $\delta y$  along the  $x$  and  $y$  directions (in the reference frame where the leading edge is at rest), after time  $\delta t$ , with respect to the location and time of its creation by severing, is given by 2D diffusion:  $P_D(\delta x, \delta y, \delta t) = (4\pi D_{olig}\delta t)^{-1} \exp[-(\delta x^2 + \delta y^2)/(4D_{olig}\delta t)]$ , where  $D_{olig}$  is the oligomer diffusion coefficient. This expression neglects the small effect of advection by cytoplasmic fluid flow as well as the boundary condition at the leading edge.

Oligomer annealing to filament ends is calculated as a bimolecular reaction with rate constant  $k_{anneal}$ . This is implemented by scanning through all pairs of oligomers and available pointed and barbed barbed ends, converting  $P_D$  to a local oligomer concentration by assuming a uniform probability along the thin  $z$  direction, and using  $\delta x$ ,  $\delta y$  as the distances between the end of the oligomer and the end on the filament that could anneal to one another. The smallest distance in the  $x$ -direction is used according to the periodic boundary conditions. If the annealing event is accepted, the length of the filament increases by the size of the oligomer. If the oligomer anneals to a barbed end, the barbed end state of the oligomer is transferred to the filament. If an oligomer did not anneal within 20 s of its creation, it was removed since in this time it likely disassembled. Removal was unlikely to occur at the chosen annealing rate constant since most oligomers annealed within a shorter time.

We checked the time step used was sufficiently small:  $k_{anneal} < 120 \mu\text{M}^{-1}\text{s}^{-1}$  resulted in less than 40% of oligomers annealing per time step, when using the reference parameter values in Table 1. We also checked that the median of the time to anneal,  $t_{anneal}$ , and the median distance between the severing and annealing events,  $r_{anneal}$ , were related as expected from a theoretical approximation of these quantities assuming all barbed ends are free:  $r_{anneal} = (4D_{olig}t_{anneal})^{1/2}$  with  $t_{anneal} = (k_{anneal}C_B)^{-1}$ , where  $C_B$  is the average concentration of barbed ends in the body of the simulated lamellipodium (Fig. S7).

## Simulated SiMS

To compare our simulations to the actin speckle appearance and disappearance in SiMS, we tagged and tracked 1% of actin monomers that add to the network through polymerization at the leading edge. Each such polymerization corresponds to a speckle appearance. Disappearance events occur when the tagged monomers depolymerize off a pointed end or when they become part of an oligomer. Annealing of an oligomer carrying a tagged monomer is an appearance. The speckle lifetime is the time between appearance and disappearance events.

## Orientation order parameter

We counted the number of filaments having a segment within the first micrometer of the leading edge and defined the order parameter similar to Weichsel and Schwarz (Weichsel and Schwarz, 2010) and Mueller et al. (Mueller et al., 2017):  $O = (N_{-70^\circ/0^\circ/70^\circ} - 2N_{\pm 35^\circ}) / (N_{-70^\circ/0^\circ/70^\circ} + 2N_{\pm 35^\circ})$ , where  $N_{-70^\circ/0^\circ/70^\circ}$  and  $N_{\pm 35^\circ}$  are the number of filaments oriented between  $-20^\circ$  to  $20^\circ$  and  $60^\circ$  to  $80^\circ$  in either direction, or between  $25^\circ - 45^\circ$  in either direction, respectively. The angle is measured with respect to the axis of network growth. For 3D simulations, we used the angles of the filaments projected along the  $xy$  lamellipodial plane.

## SiMS imaging experiments

SiMS experiments using Dylight 550 labeled actin introduced to XTC cells by electroporation was performed as in (Yamashiro et al., 2014). Cells adhered on a poly-lysine-coated glass coverslip were observed by epi-fluorescence microscopy. For measurements of speckle lifetime distribution, the exposure time was  $0.1 \text{ s/frame}$ . The lifetime data were normalized for photobleaching as in (Watanabe and Mitchison, 2002). In Figure 6A experiments, the leading edge was manually marked by a line which connects the centers of furthestmost speckles in several consecutive images. Only actin SiMS that appeared within  $\sim 300 \text{ nm}$  from the line were analyzed for lifetimes. Lifetimes of  $0.1 \text{ s}$  were omitted as being beyond the temporal resolution limit. Disassembly of actin speckles in lamellipodia of XTC cells were also observed after treatment with  $5 \mu\text{M}$  cytochalasin D, added after several seconds from the start of observation, at  $2 \text{ s}$  intervals.



## Parameter scan for severing rates and oligomer size

To estimate parameters for uniform and enhanced end severing rates ( $k_{unif}^{sev}$ ,  $k_{end}^{sev}$ ), we performed a parameter search over these values as well as the maximum oligomer length  $l_{max}^{olig}$ . To summarize the results, we classified each set of these parameters in terms of their ability to match the actin network structure and concentration, actin speckle dynamics, and if there was an increase in length between the front and back of the lamellipodium (Figs. S3 and S5):

- *Matching actin network structure and concentration.* We marked a parameter set as satisfying this condition when the following occurred: (i) The F-actin concentration near the leading edge was 700-1500  $\mu\text{M}$  for keratocytes and 400-1300  $\mu\text{M}$  for XTC parameters (Mueller et al., 2017; Schaub et al., 2007; Vinzenz et al., 2012; Watanabe, 2010); (ii) The midpoint of the concentration profile fell between 5-15  $\mu\text{m}$  (keratocytes) and 3-10  $\mu\text{m}$  (XTC cells); (iii) The barbed end and branch concentration profiles were within 50% of measurements of keratocyte and fibroblast lamellipodia using electron tomograms (Mueller et al., 2017; Vinzenz et al., 2012).
- *Matching actin speckle dynamics.* We indicated agreement with actin speckle SiMS (Smith et al., 2013; Watanabe and Mitchison, 2002; Yamashiro et al., 2018) when the following conditions were met: (i) Actin speckle lifetimes peak at short times, satisfied when the probability of speckles with lifetimes between 2-4 s was 0.025-0.055 for keratocytes (from the full distribution ranging from 2-60 s) and the probability of lifetimes between 4-8 s for XTC cells was 0.035-0.08 (from the full distribution between 4-144 s). We did not include lifetimes shorter than 2 or 4 s, respectively, that could be at the limits of experimental resolution; (ii) The lifetime distribution extended to lifetimes longer than 10 s (at least 20%); (iii) The normalized speckle appearance and disappearance profiles as a function of distance from the leading edge were consistent with SiMS. In simulations without annealing, the speckle lifetime distribution did not peak monotonically at the shortest lifetimes, so we separately marked parameter sets with a peak within the first 15 s (keratocytes) or 35 s (XTC).
- *Increase in length away from leading edge.* We considered length increase to occur if the filament length at 50% of the cumulative length distribution of filaments with segments between 3-4  $\mu\text{m}$  away from the leading edge was at least 0.2  $\mu\text{m}$  (keratocytes) or 0.1  $\mu\text{m}$  (XTC) larger compared to 0-1  $\mu\text{m}$  away from the leading edge.

## Estimation of branching and capping rates by comparison to prior electron tomograms

Capping and branching rates were determined by comparing to the the barbed end, branch and filament number of electron micrographs of fibroblast cells in Vinzenz et al. (Vinzenz et al., 2012) (used for the XTC parameter set) and barbed end, pointed end and filament number from Mueller et al. (Mueller et al., 2017) for the keratocyte parameter set. In all instances of data comparison for the barbed end and pointed end number of Mueller et al., the average value of two 0.106  $\mu\text{m}$  bins was compared to simulation results of 0.212  $\mu\text{m}$  bins.

We use a simplified 2D dendritic nucleation model, without severing and annealing, to estimate the capping and branching rates for our simulations of keratocyte and XTC cases. We assume linear actin filaments, all oriented  $\pm 35^\circ$  relative to the leading edge with the  $-y$  direction toward the center of the cell. These filaments polymerize, branch, cap and move with respect to the position of the leading edge due to retrograde flow or cell protrusion. Filaments with free barbed ends (uncapped) remain at the leading edge and continue to polymerize. As they cap, they stop polymerization and move toward the center of the cell with retrograde flow. For the purposes of this section, we do not consider uncapping of already capped filaments. Branches form at the leading edge and also move away with retrograde flow. Denoted by  $l$  the length of a filament with barbed end located at  $y$ , the system of equations for the number of uncapped  $n_u(l, t)$ , capped  $n_c(l, y, t)$  barbed ends and branches  $n_{br}(y, t)$  are:

$$\frac{\partial n_u(l, t)}{\partial t} = k_{br}\delta(l) - k_{cap}n_u(l, t) - v_{pol,35}\frac{\partial n_u(l, t)}{\partial l}, \quad (1)$$

$$\frac{\partial n_c(l, y, t)}{\partial t} = k_{cap}n_u(l, t)\delta(y) - v_{net}\frac{\partial n_c(l, y, t)}{\partial y}, \quad (2)$$

$$\frac{\partial n_{br}(y, t)}{\partial t} = k_{br}\delta(y) - v_{net}\frac{\partial n_{br}(y, t)}{\partial y}, \quad (3)$$

The first term on the right hand side of eqn 1 represents the branching source term which creates a new filament at 0 length. The last term of eqn 1 is polymerization of the filaments with  $v_{net} = v_{pol} \cos(35^\circ)$ . The second term of eqn 1 and first term of eqn 2 represents the loss of uncapped filaments and addition of capped filaments. The second term of eqn 2 represents retrograde flow of capped filaments. Eqn 3 accounts for the generation of branches and their motion with retrograde flow toward the center of the cell.

Holz et al.

In steady-state, the solutions of the uncapped and capped ends to be exponential and the number of branches is:

$$n_u(l) = \frac{k_{br}}{v_{pol}} e^{-l/\bar{l}} \quad (4)$$

$$n_c(l, y) = \frac{k_{cap} k_{br}}{v_{net} v_{pol,35}} e^{-l/\bar{l}} \quad (5)$$

$$n_{br}(y) = \frac{k_{br}}{v_{net}} \quad (6)$$

where  $\bar{l} = v_{pol,35}/k_{cap}$ . To compare to electron tomogram quantifications we calculate the number of branches, barbed ends and the number of filaments in bins of increasing distance to the leading edge.

Integrating eqn. 6 over  $y$  from the minimum to maximum of the bin we find the number of branches within the  $i^{\text{th}}$  bin,  $N_{br,i}$ .

$$N_{br,i} = \frac{k_{br} \Delta y}{v_{net}}, \quad i = 1, 2, 3, \dots \quad (7)$$

where  $\Delta y$  is the bin width centered at  $y = (1/2 - i)\Delta y$  such that  $i = 1$  is the bin that includes the leading edge.

The number of barbed ends within a bin centered at  $y$  depends on the total number of capped and uncapped filaments. We integrate over all filament lengths  $l$  and the distance from the leading edge  $y$ :

$$N_{BE}(y) = \int_0^\infty n_u(l) dl \int_{y-\Delta y/2}^{y+\Delta y/2} \delta(y) dy + \int_0^\infty \int_{y-\Delta y/2}^{y+\Delta y/2} n_c(l, y) dy dl. \quad (8)$$

We find the solution for the number of barbed ends in the  $i^{\text{th}}$  bin to be:

$$N_{BE,i} = \frac{k_{br}}{k_{cap}} \delta_{i,1} + \frac{k_{br}}{v_{net}} \Delta y, \quad i = 1, 2, 3, \dots \quad (9)$$

In the electron tomograms, the filament number was measured by counting the number of filaments crossing the middle plane of the measured bins. We calculate the equivalent filament number by integrating the sum of the capped and uncapped filaments that are long enough to cross the distance in  $y$  at the center of such bins:

$$N_{fil}(y) = \int_{-y/\cos(35)}^\infty n_u(l) dl + \int_0^{-y} ds \int_{s/\cos(35)}^\infty n_c(l, y-s) dl. \quad (10)$$

Integrating, we find,

$$N_{fil}(y) = \frac{k_{br}}{k_{cap}} (2e^{\frac{y k_{cap}}{v_{net}}} - 1) \quad (11)$$

which can be evaluated at bin  $i$  using  $y = (1/2 - i)\Delta y$ .

| Quantity                  | Fibroblast Region ( $\mu\text{m}$ ) | Fibroblast Value | Keratocyte Region ( $\mu\text{m}$ ) | Keratocyte Value |
|---------------------------|-------------------------------------|------------------|-------------------------------------|------------------|
| Barbed ends (first bin)   | 0-0.25                              | 580              | 0 - 0.212                           | 309              |
| Barbed ends (second bin)  | 0.25-0.5                            | 170              | 0.212-0.424                         | 238              |
| Branches (first bin)      | 0-0.25                              | 150              | N/A                                 | N/A              |
| Branches (second bin)     | 0.25-0.5                            | 150              | N/A                                 | N/A              |
| Pointed ends (first bin)  | N/A                                 | N/A              | 0 - 0.212                           | 91               |
| Pointed ends (second bin) | N/A                                 | N/A              | 0.212-0.424                         | 231              |
| Filaments (first bin)     | 0-0.25                              | 150              | 0 - 0.106                           | 200              |
| Filaments (second bin)    | 0.25-0.5                            | 130              | 0.106-0.212                         | 256              |

Table 2: Barbed end, branch and filament number for fibroblast cells in Vinzenz et al. (Vinzenz et al., 2012) and keratocyte cells from Mueller et al. (Mueller et al., 2017) for lamellipodia region of 1  $\mu\text{m}$ . Since the leading edge is not well defined in the EM tomograms, we consider the leading edge to begin at the maximum barbed end value but we also include the number of barbed ends that would be considered outside the cell (with this definition) in the region of 0-0.212  $\mu\text{m}$ .

### Parameter estimation for keratocyte parameter set

Mueller et al. (Mueller et al., 2017) quantified the number of barbed, pointed ends and filaments in keratocyte lamellipodia near the leading edge. Assuming all pointed ends near the leading edge are at a branch, we can solve eqn. 7 for the branching rate  $k_{br}$  using the relative network velocity  $v_{net} = 0.2 \mu\text{m/s}$ ,  $\Delta y = 0.212 \mu\text{m}$  and an estimate for the number of branches,  $N_{br}$ . Unlike eqn. 7 in the simple model considered in this supplementary text, the number of pointed ends in Mueller et al. (Mueller et al., 2017) increased over the first  $0.424 \mu\text{m}$  (two bins). Using the average number of pointed ends over two bins from the leading edge as an estimate of  $N_{br}$  in eqn. 7 leads to  $k_{br} = 152/s/\mu\text{m}$ . This number is consistent with the  $k_{br}$  value calculated using the number of pointed ends at longer distances, beyond the first two bins.

Using this estimate for  $k_{br}$ , we can estimate  $k_{cap}$  in two different ways:

- (i) Using eqn. 9 with  $i = 1$  and Table 2 we find the capping rate to be  $k_{cap} = 1.02/s$ .
- (ii) Numerically solving eqn. 11, using the number of filaments from Table 2 with  $i = 2$  and  $k_{br}$  from above, we find  $k_{cap} = 0.32/s$  (we do not consider  $i = 1$  since the number of filaments is increasing within the region  $0-0.106 \mu\text{m}$ , unlike in the current model).

In the main text and supplementary figures we used branching rate and capping rates similar to the values calculated in (i) and (ii):  $k_{cap} = 0.6/s$  was required to produce consistent results when depolymerization and severing was included in the simulation.

### Parameter estimation for XTC parameter set

Vinzenz et al. (Vinzenz et al., 2012) studied lamellipodia of fibroblast cells and measured branch, barbed end and filament number close to the leading edge, as well as the filament length distribution. The values in the first two bins shown in Table 2 used  $\Delta y = 0.25 \mu\text{m}$  and in this system  $v_{net} = 0.03 \mu\text{m/s}$  Vinzenz et al. (2012).

The branching rate can be estimated using eqn. 7 and Table 2 to find  $k_{br} = 17.9/s/\mu\text{m}$ .

We can estimate the capping rate  $k_{cap}$  in three different ways as follows.

- (i) Using the calculation for the number of barbed ends of eqn. 9. From eqn. 9, the value of barbed ends in bins 2 and higher is of the same order as the number of branches in eqn. 7, consistent with the measurements in Vinzenz et al. in Table 2. The ratio of barbed ends in the first bin to the second bin is however a value that depends on  $k_{cap}$  but is independent of  $k_{br}$ :

$$\frac{N_{BE,1}}{N_{BE,2}} = \frac{1/k_{cap} + \Delta y/v_{net}}{\Delta y/v_{net}} \quad (12)$$

Solving for the capping rate using  $N_{BE,1}/N_{BE,2} = 580/170$  leads to  $k_{cap} = 0.082/s$ .

- (ii) Using the solution for the number of filaments of eqn. 11 and the values in Table 2. We find for  $i = 1$ ,  $k_{cap} = 0.06/s$  and  $i = 2$ ,  $k_{cap} = 0.04/s$ .

- (iii) Comparison to the average filament length  $\bar{l} = v_{pol,35}/k_{cap}$ . The median filament length from Vinzenz et al. (Vinzenz et al., 2012) is approximately  $162 \text{ nm} \approx 60 \text{ sub}$  (a value similar to Bailly et al. who measured filament lengths to be between 100 and 200 nm (Bailly et al., 1999) near the leading edge of MTLn3 cells). Using this value for  $\bar{l}$ , we find  $k_{cap} = 0.23/s$ .

In the main text and supplementary figures we used values of  $k_{br} = 30/s/\mu\text{m}$ , and  $k_{cap} = 0.2/s$  to produce the same F-actin density at the leading edge while using  $v_{net} = 0.05 \mu\text{m/s}$  (comparable to retrograde flow in XTC cells) and also producing consistent results when depolymerization and severing is added.
